# Supplementary material
Source: PubMed Central journal article supplement (PMC4035988)
Supplement: 1400457111_sapp.pdf [file 1400457111_sapp.pdf]

## SUPPORTING INFORMATION

### **Partner choice and fidelity stabilize coevolution in a Cretaceous-age defensive symbiosis**

Martin Kaltenpoth<sup>a,b,1</sup>, Kerstin Roeser-Mueller<sup>b</sup>, Sabrina Koehler<sup>a</sup>, Ashley Peterson<sup>c,d</sup>, Taras Y. Nechitaylo<sup>a</sup>, J. William Stubblefield<sup>e</sup>, Gudrun Herzner<sup>b</sup>, Jon Seger<sup>d</sup>, Erhard Strohm<sup>b</sup>

<sup>a</sup>Insect Symbiosis Research Group, Max Planck Institute for Chemical Ecology, 07745 Jena, Germany.

<sup>b</sup>Department of Zoology, University of Regensburg, 93040 Regensburg, Germany.

<sup>c</sup>Huntsman Cancer Institute, University of Utah, Salt Lake City, UT 84112, USA.

<sup>d</sup>Department of Biology, University of Utah, Salt Lake City, UT 84112, USA.

<sup>e</sup>Fresh Pond Research Institute, Cambridge, MA 02140, USA.

<sup>1</sup>To whom correspondence should be addressed. Email: [mkaltenpoth@ice.mpg.de](mailto:mkaltenpoth@ice.mpg.de).

# Contents

|                                                                                                       |           |
|-------------------------------------------------------------------------------------------------------|-----------|
| <b>Supplementary methods</b> .....                                                                    | <b>3</b>  |
| DNA extraction, PCR and sequencing of host genes.....                                                 | 3         |
| Reconstruction of the host phylogeny .....                                                            | 3         |
| Dating of the host phylogeny .....                                                                    | 5         |
| DNA extraction, PCR and sequencing of CaSP genes .....                                                | 7         |
| Symbiont phylogenetic analysis .....                                                                  | 8         |
| Detection of opportunistic bacteria in <i>Philanthini</i> antennae.....                               | 9         |
| Localization of <i>Amycolatopsis</i> in <i>Philanthus</i> cf. <i>basalis</i> antennae.....            | 10        |
| Production of AGS by bees with CaSP or other Actinobacteria .....                                     | 11        |
| Detection of CaSP in sand surrounding <i>P. triangulum</i> nests.....                                 | 11        |
| <b>Supplementary tables</b> .....                                                                     | <b>13</b> |
| Supplementary Table S1: Beewolf specimens for host phylogeny.....                                     | 13        |
| Supplementary Table S2: Primers and probes.....                                                       | 14        |
| Supplementary Table S3: Primer combinations and PCR conditions .....                                  | 14        |
| Supplementary Table S4: Model parameters and results of the dating analyses .....                     | 15        |
| Supplementary Table S5: Infection prevalence of CaSP across host species.....                         | 16        |
| Supplementary Table S6: Beewolf specimens for symbiont phylogeny .....                                | 17        |
| Supplementary Table S7: Accession numbers for Actinobacteria sequences .....                          | 19        |
| Supplementary Table S8: Antennal symbionts of AGS+ and AGS- females.....                              | 20        |
| Supplementary Table S9: Results of partner choice assays .....                                        | 20        |
| <b>Supplementary figures</b> .....                                                                    | <b>21</b> |
| Supplementary Figure S1: Beewolf host phylogeny.....                                                  | 21        |
| Supplementary Figure S2: Dated host phylogeny, HKY+G model .....                                      | 22        |
| Supplementary Figure S3: Dated host phylogeny, HKY+G model, fixed input tree ..                       | 23        |
| Supplementary Figure S4: Dated host phylogeny, HKY+G+I model.....                                     | 24        |
| Supplementary Figure S5: Phylogeny of all antennal Actinobacteria (16S rRNA) ....                     | 25        |
| Supplementary Figure S6: FISH of <i>Amycolatopsis</i> in a <i>P.</i> cf. <i>basalis</i> antenna ..... | 26        |
| Supplementary Figure S7: FISH of CaSP in a <i>P. triangulum</i> antenna .....                         | 27        |
| Supplementary Figure S8: Symbiont phylogeny (all genes).....                                          | 28        |
| Supplementary Figure S9: Phylogeny of CaSP across 109 host individuals (gyrA)..                       | 29        |
| Supplementary Figure S10: Detection of CaSP in sand.....                                              | 30        |
| <b>Supplementary references</b> .....                                                                 | <b>31</b> |

## DNA extraction, PCR and sequencing of host genes

DNA was extracted either from insect thoraces or, to allow for later morphological determination of single specimens, from three legs. The MasterPure™ Complete DNA and RNA Purification Kit (Epicentre, Madison, WI, USA) was used for DNA isolation according to the manufacturer's instructions. PCR amplifications were performed on a TGradient Thermocycler (Biometra, Göttingen, Germany), in final reaction volumes of 12.5 µl, composed of 1 µl genomic DNA extract, 1 µl of each primer (10 µM), 1.5 µl dNTP-Mix (2 mM; Fermentas, St. Leon-Rot, Germany), 1.25 µl Peqlab reaction buffer (200 mM Tris-HCl (pH 8.55 at 25 °C), 160 mM (NH<sub>4</sub>)<sub>2</sub>SO<sub>4</sub>, 0.1% Tween 20, 20 mM MgCl<sub>2</sub>) and 0.5 units SAWADY Taq DNA polymerase (Peqlab, Erlangen, Germany). Cycle parameters were as follows: 3 min initial denaturation at 94°C, followed by 35 cycles of 94°C for 40 sec, the primer-specific annealing temperature for 40 sec, 72°C for 40 sec (or 90 sec for longer fragments), and a final extension of 4 min at 72°C. Primer sequences and references are listed in Table S2, details on primer combinations, annealing temperatures and the corresponding fragment lengths are summarised in Table S3. Prior to sequencing, PCR products were purified with the peqGOLD MicroSpin Cycle-Pure Kit (Peqlab Biotechnologie GmbH, Erlangen, Germany) following the manufacturer's protocol. Sequencing was done commercially at Seqlab Sequence Laboratories (Göttingen, Germany).

Partial sequences of six different genes were obtained, all of which have previously been shown to be useful for phylogenetic analyses in Hymenoptera (1-4): A fragment of the subunit 1 of the mitochondrial cytochrome oxidase gene (*coxI*; 841 bp) was amplified and sequenced, as well as a fragment of the ribosomal 28S gene (*28S*; 865 bp). Additionally, the following four single-copy nuclear genes were used: Wingless (*wnt*, comprising of 378 bp cds), long-wavelength rhodopsin (*lwrh*, comprising of 608 bp of cds and 156 bp ncs), arginine kinase (*argK*, with 825 bp cds and 111 bp ncs), and elongation factor 1α (*ef1a*, including 1,041 bp cds and 696 bp ncs). The listed fragment lengths are those of the processed sequences used for the phylogenetic analyses. Primer sequences and PCR conditions for amplification of the host genes are given in Tables S2 and S3. Outgroup sequences for *Apis*, *Bembix*, and *Bicyrtes* could be obtained from the NCBI database. Accession numbers for all sequences are given in Table S1.

## Reconstruction of the host phylogeny

Sequences were aligned using BioEdit 7.0.5.3 (5) and SeaView 4.2.6 (6). All alignments were checked and corrected manually. Open reading frames and intron / exon boundaries were identified by comparison with published coding sequences for *Apis mellifera* (*lwrh*: BK005514.1; *argK* AF023619.1; *ef1a*: NM\_001014993.1) or via a blast search against non-redundant sequences

in the NCBI database. As substitution rates and patterns can differ greatly between coding (cds) and non-coding sequences (ncs), we split the dataset into nine partitions: *28S*, *coxI*, *wnt*, *lwrh*-cds, *lwrh*-ncs, *argK*-cds, *argK*-ncs, *ef1a*-cds, and *ef1a*-ncs. Due to high substitution rates, the non-coding sequences could only be reliably aligned within the Philanthini species. Therefore, we coded the intron sequences of all outgroup taxa as missing data and thus excluded them from the analyses.

In a first step, we reconstructed nine separate gene trees using fast likelihood inferences with the software RAxML v7.0.4 (7-9) corresponding to the nine partitions determined above. Maximum likelihood (ML) searches were conducted with the rapid hill-climbing algorithm (7) under the General Time-Reversible model with four gamma parameters GTR+G (10-12). Support values (100 bootstrap steps) were calculated for each node and topologies were manually compared among the gene trees. Because none of the strongly supported nodes were different, we combined all loci in one supermatrix.

Additionally, searches for a saturation effect within one of the three codon positions were conducted for the genes *wnt*, *coxI*, *lwrh*, *argK*, and *ef1a* by calculating homoplasy indices (HI) for each codon position and gene separately. The software PAUP\* 4.0 beta (13) was used for these analyses. The homoplasy index of the third codon position of the genes *coxI* and *lwrh* ( $HI(coxI)=0.66$ ,  $HI(lwrh)=0.46$ ) were higher compared to the first and second positions ( $HI: CO-1^{st}=0.52$ ,  $coxI-2^{nd}=0.25$ ,  $lwrh-1^{st}=0.34$ ,  $lwrh-2^{nd}=0.18$ ). Therefore, we excluded the third codon positions of the genes *coxI* and *lwrh* from further analyses, or we used the translated amino acid sequences (stated for each analysis).

In a next step, multiple independent analyses with different data partitioning strategies (1-4) were performed to test for the robustness of the phylogenetic reconstructions: (1) unpartitioned, (2) four partitions with combined nuclear introns, exons and mitochondrial sequences separately, plus *28S* sequences, (3) nine partitions with single genes separately and splitting coding and non-coding sequence parts, (4) complete random partitioning in 9 partitions; all analyses were conducted with excluded third codon positions of the genes *coxI* and *lwrh* and also with base sequences translated into amino acid sequences. The best fitting evolutionary model for the amino acid-translated sequences (*coxI*, *lwrh*) was inferred with ProtTest v1.4 (14). The CPREV model showed the highest fit for *lwrh*, and the MTREV for *coxI*. From these different runs, we chose the tree with the highest likelihood for presentation. Bootstrap support values were obtained through a full non-parametric bootstrap inference with 10,000 replicates, carried out separately with RAxML.

Bayesian inferences were run with the program MrBayes 3.1.2 (15-17). The searches were also conducted under the GTR+G model with four rate categories. We ran each analysis for 10,000,000

generations and sampled trees every 1,000 generations. We checked if the standard deviation of split frequencies was consistently less than 0.01, and we used a “Burnin” of 20%, i.e. the first 20% of the sampled trees were discarded. We computed 50% majority rule consensus trees for each analysis with posterior probability values for every node. Different partition schemes (1-4) were analyzed as well (see above). However, mixed data sets consisting of DNA and protein sequences cannot be analyzed in MrBayes, so only nucleotide sequences were used, and third codon positions were excluded for *coxI* and *lwrh*.

Equal weighted maximum-parsimony (MP) analyses were performed using the program PAUP\* 4.0 beta (13). We used a heuristic search and TBR (tree-bisection-reconnection) for branch swapping. Bootstrap supports were obtained from 1,000 independent replicates. The third codon positions of *coxI* and *lwrh* were excluded for all MP analysis as well. Further, MP analyses were only conducted for the partition schemes (1) and (3). Since all three analyses (ML, Bayesian, and MP) yielded very similar tree topologies, the results were combined for visualization (Fig. S1).

### Dating of the host phylogeny

Divergence time estimations were inferred using BEAST v1.7.5 (18). MCMC analyses with HKY and GTR nucleotide substitution models (empirical or estimated base frequencies, various site heterogeneity models [none, G, I+G]) were conducted under a strict clock (using a single rate of sequence evolution across the phylogeny) and an uncorrelated lognormal relaxed clock model (allowing variable substitution rates; 19). In each analysis, 25 million steps were performed, and trees were sampled every 2,500 steps. To estimate the influence of partitioning, analyses were conducted with the partitioned (9 gene partitions, codon partitioning (1+2, 3) for *argK*, *ef1a* and *wnt*) as well as with the unpartitioned dataset (3<sup>rd</sup> codon positions excluded for *coxI* and *lwrh* in both datasets due to saturation). The phylogenetic tree from the ML analysis (see previous section) was used as the starting tree in all analyses. In some of the analyses, the starting tree was fixed by removing the tree priors from the BEAST input file (see Table S4).

Four calibration points were included in the initial dating analysis: (A) The age of the Bembicinae with oldest fossils known from Florissant beds in Colorado (*Psammaecius sepultus*, originally described as *Hoplisus sepultus* by Cockerell (20), reviewed by Pulawski and Rasnitsyn (21) and transferred to the extant bembicin genus *Psammaecius*), which date back to the latest Eocene (~34.1 Mya) (22), (B) the age of the oldest *Cerceris* fossil from late Stampian (*Cerceris berlandi*, ~30 Mya) shales in France (23), (C) the age of the oldest *Philanthus* fossils from Colorado (*Philanthus saxigenus* and *Prophilanthus destructus*, ~34.1 Mya) (24, 25), and (D) the root age was calibrated based on earlier phylogenetic analyses (26, 27). Minimum age constraints for the

Bembicinae and the *P. saxigenus* fossil were modelled with lognormal distributions (mean±SD=34.1±0.5, offset=20.0 for both fossils). The age of the *Cerceris* fossil was used to place a hard lower boundary on the age of the Cercerini+Aphilanthopini clade (uniform distribution, minimum=30.0, maximum=1,000.0; or lognormal distribution with mean±SD=30.0±0.75, offset=20.0). As the phylogenetic relationship of Crabronidae subfamilies and bees (“Apidae” *sensu lato*) is still controversial (26, 28, 29), we did not enforce monophyly of the Crabronidae (Philanthinae+Bembicinae).

Five compression fossils described from 1906 to 1944 have been assigned to the Philanthinae by earlier authors: *Prophilanthus destructus* (20), *Philanthus saxigenus* (24), *Philoponites clarus* (30), *Philanthus annulatus* (25), and *C. berlandi* (23). No recent publication has reviewed the systematic affinities of these specimens. In our view, only the *Cerceris* specimen is clearly assignable to Philanthinae. Timon-David's (23) description and illustration leave no doubt that the specimen belongs to the philanthine tribe Cercerini. When it comes to the other four specimens, however, no structures are described or illustrated that would convincingly associate them with the Philanthinae, much less the tribe Philanthini. Therefore, the dating analyses were also repeated excluding the *Philanthus* fossil calibration point.

The root of the tree was modelled with a normal distribution with mean±SD=140.0±10.0, since both the divergence of Sphecidae from the other Apoidea and that of Crabronidae and bees have been estimated to the period of 130-150 Mya (26, 27). This time period coincides with the estimated rise of the angiosperms. Due to their tight association with angiosperms, bees and crabronid wasps have likely evolved with or after the origin of angiosperms (26, 31). However, to assess the effect of root age on the divergence estimates, we additionally performed analyses without a root age prior.

Evaluation and comparison of the models was performed using Tracer v1.5 (32). Bayes factors (BF) were computed for comparison of marginal likelihood values, and  $\log_{10}BF > 100$  were interpreted as decisive evidence for differences in model performance. A summary of model parameters and results of the dating analyses are given in Table S4. For visualization of the results, the maximum clade credibility tree was inferred with TreeAnnotator (18), using a burnin of 1,000 and a posterior probability limit of 0.5. The consensus tree was visualized with FigTree v1.3.1 (33), including highest posterior density (HPD) intervals (Fig. 1 and S2-S4). Due to the unclear systematic position of the putative Philanthini fossils, the analyses excluding this calibration point were displayed (Fig. 1 and S2-S4). It should be noted, however, that the analyses including the Philanthini fossils yielded identical tree topologies and very similar age estimates (see Table S4).

Among the tested evolutionary models (GTR, GTR+I+G, HKY, HKY+G, HKY+I+G), assessment of convergence and Tracer v1.5 (32) evaluation of Bayes factors revealed the HKY+G and HKY+I+G as the best models (Table S4). Across all models, the partitioned dataset (nine gene partitions, and codon partitioning [1+2, 3] for *argK*, *ef1a* and *wnt*) consistently yielded better likelihood scores than the non-partitioned dataset, and the uncorrelated lognormal relaxed clock model outperformed the strict clock model. Despite some minor topological discrepancies within the Philanthini (i.e. the placement of *Trachypus boharti*, *Philanthus albopilosus*, and *Philanthus ventilabris*, see Fig. S2 and S4), both HKY+G and HKY+I+G models consistently yielded age estimates of 64.7 to 68.7 Mya (lower boundary) to 102.0 to 107.5 Mya (upper boundary) for the age of the beewolf-*Streptomyces* symbiosis, regardless of whether the input tree was fixed to the ML input tree or not. Furthermore, estimates for the symbiosis age changed only slightly when a uniform distribution was used to model the ancestral age of the Cercerini+Aphilanthopini instead of a lognormal distribution, or when the putative *Philanthus* and *Prophilanthus* fossils or the root calibration was omitted, respectively (60.1 to 68.3 Mya for the lower and 92.3 to 110.5 for the upper boundary). Omitting both calibration points, however, resulted in low performance of the HKY+G model and yielded considerably lower age estimates for the symbiosis (39.4 to 56.3 Mya for the lower and 62.8 to 86.4 Mya for the upper boundary).

### **DNA extraction, PCR and sequencing of CaSP genes**

Genomic DNA was extracted from whole beewolf antennae according to a standard phenol-chloroform extraction protocol (34) or with the MasterPure™ Complete DNA and RNA Purification Kit (Epicentre Biotechnologies) according to the manufacturer's instructions. The presence of '*Candidatus Streptomyces philanthi*' in the antennae was confirmed by diagnostic PCR using the specific 16S rDNA primer Strep\_phil\_fwd3 in combination with the general actinomycete primer Act-A19 as described earlier (35). Almost complete 16S rDNA sequences of many '*Ca. S. philanthi*' ecotypes had already been sequenced earlier (35-37). The 16S rDNA of additional specimens was amplified with the primers fD1 and Spa-2R, and sequenced bi-directionally with fD1 and rP2 (Tables S2 and S3). PCR amplifications were performed on a Biometra® T-Gradient Thermocycler or on a VWR Gradient Thermocycler in a total reaction volume of 25 µl containing 2 µl of template, 1x PCR buffer (10 mM Tris-HCl, 50 mM KCl, 0.08% Nonidet P40), 2.5 mM MgCl<sub>2</sub>, 240 µM dNTPs, 20 pmol of each primer, and 1 U of Taq DNA polymerase (MBI Fermentas). Cycle parameters were as follows: 3 min. at 94°C, followed by 32 cycles of 94°C for 40 sec., 65°C for 1 min., and 72°C for 1 min., and a final extension time of 4 min. at 72°C.

Parts of the elongation factor Tu and the elongation factor G as well as the intergenic spacer region (collectively referred to as *fus-tuf* in the following) of 'Ca. *S. philanthi*' were amplified by using the primer pairs EF-Tu-1F/EF-Tu-2R and EF-Tu-3F/EF-Tu-3R, respectively, and sequenced using the same primers (Tables S2 and S3). The primer pairs gyrB-F1/gyrB-R3 and gyrB-F3/gyrB-R10 amplified overlapping fragments of the gyrase B gene (*gyrB*) of the endosymbionts that could be sequenced by using the same primers. Additionally, a 627 bp fragment of gyrase A (*gyrA*) was amplified using primers gyrA-5F/gyrA-5R and sequenced unidirectionally using primer gyrA-5F (Tables S2 and S3). PCR reaction mixtures were the same as described for the amplification of the 16S rDNA. Cycle parameters were as follows: 3 min. at 94°C, followed by 35 cycles of 94°C for 40 sec., 65°C (*fus-tuf* primers) or 62°C (*gyrB* primers) or 60°C (*gyrA* primers) for 40 sec., and 72°C for 40 sec., and a final extension time of 4 min. at 72°C. Sequencing was done in the Department of Entomology at the Max Planck Institute for Chemical Ecology (Jena, Germany) or commercially by SEQLAB Sequence Laboratories (Göttingen, Germany).

### **Symbiont phylogenetic analysis**

For the phylogenetic analysis, 16S rRNA, *gyrA*, *gyrB*, and *fus-tuf* sequences of all *Streptomyces* species for which fully sequenced or good draft genomes were available were retrieved from the NCBI database. Additionally, cultures of three closely related strains (based on 16S rRNA, *Streptomyces ramulosus* DSM 40100, *Streptomyces abikoensis* DSM 40831, and *Streptomyces mutabilis* DSM 40169) were obtained from the German Collection of Microorganisms and Cell Cultures (DSMZ, Braunschweig, Germany), and the four gene fragments were sequenced as described above.

All protein-coding sequences were assembled and aligned based on their translated amino acid sequences using Geneious Pro 5.4 (38). The 16S rRNA gene sequences were imported into ARB and aligned against closely related *Streptomyces* sequences based on the secondary structure prediction (39). The alignments were concatenated in BioEdit 7.0.5.3 (5). The concatenated alignment consisted of a total of 4653 bp (1391 bp of 16S rDNA, 639 bp of *fus*, 930 bp of *tuf*, 249 bp of *fus-tuf* intergenic spacer, 765 bp of *gyrB*, and 549 bp of *gyrA*). Accession numbers for all symbiont and other Actinobacteria sequences are given in Tables S6 and S7, respectively.

Approximately-maximum-likelihood trees were reconstructed with FastTree 2.1 using the GTR model (40). Local support values were estimated with the Shimodaira-Hasegawa test based on 1,000 resamples without reoptimizing the branch lengths for the resampled alignments (40). Additionally, a maximum likelihood tree was reconstructed using PHYML (41) as implemented in Geneious Pro 5.4 (38). The GTR+I+G model was chosen, the transition/transversion ratio was set



to 4 (fixed), and both the proportion of invariable sites and the gamma distribution parameter were estimated. Bootstrap values were obtained from a search with 1,000 replicates.

Bayesian inferences were run with the program MrBayes 3.1.2 (15-17), with the concatenated alignment split into six partitions: 16S rRNA, *gyrA*, *gyrB*, *fus*, *tuf*, and the *fus-tuf* intergenic spacer. The searches were conducted under the GTR+I+G model. We ran each analysis for 20,000,000 generations and sampled trees every 1,000 generations. A “burnin” of 25% was used, i.e. the first 25% of the sampled trees were discarded. We checked if the standard deviation of split frequencies was consistently lower than 0.01. We computed a 50% majority rule consensus tree with posterior probability values for every node. Since the phylogenetic trees reconstructed with the three different methods were topologically very similar, the results were combined into a single figure (Fig. S8).

To gain more comprehensive insights into within-species patterns of symbiont phylogenetic relationships, we sequenced *gyrA* for the symbionts of 109 beewolf individuals across 41 species (for accession numbers see Table S6). We aligned the sequences as described above and used FastTree 2.1 for phylogenetic reconstruction, with the same settings as for the concatenated alignment (Fig. S9).

### **Detection of opportunistic bacteria in Philanthini antennae**

In a few cases, bacteria other than CaSP could be found in the antennae of female beewolves. To assess the incidence of CaSP across beewolf species, 338 specimens of 34 different Philanthini species were screened for the presence of CaSP by diagnostic PCR using the specific 16S rDNA primer Strep\_phil\_fwd3 in combination with the general actinomycete primer Act-A19 as described earlier (35). Additionally, since bacteria of the genus *Amycolatopsis* were detected repeatedly, and notably in the only two specimens of *Philanthus* cf. *basalis* investigated, the same specimens were screened for the presence of *Amycolatopsis* by using the specific primer Amy\_16S\_1F in combination with the actinobacterial primer Act-A19 (Table S3). Antennal specimens that were negative for both CaSP and *Amycolatopsis* were tested with the general actinobacterial primer pair Act-S20/Act-A19 (Table S3) and subsequently with the general eubacterial primers EUB933F-GC (5'-CGCCCGCCGCGCGCGGGCGGGGCGGGGGCACGGGGGGGCACAAGCGGTGGAGCATGTGG-3') and EUB1387R (5'-GCCCCGGGAACGTATTCACCG-3') (42, 43). Amplification products of the actinobacterial PCR were sequenced directly, whereas those of the eubacterial PCR were separated by temperature-gradient gel electrophoresis (TGGE) prior to sequencing as described earlier (44). Briefly, TGGE gels (50ml) were prepared with a final concentration of 8% polyacrylamide (60:1), 8M urea, 0.1X TBE buffer

and 2% glycerol, and polymerized on polybond films (Biometra) by adding 110µl TEMED (N,N,N',N'-tetramethylethan-1,2-diamine) and 40µl ammoniumpersulfate (50%). After electrophoresis for 18 hours at 150V with a temperature gradient from 40°C to 50°C on a TGGE Maxi System (Biometra), gels were stained with silver nitrate as described previously (44). Bands were excised using a sterile scalpel, and the DNA was re-eluted overnight at 4°C in 50µl LowTE buffer (1mM Tris, 0.1mM EDTA). Excised bands as well as amplicons from the *Amycolatopsis*- and actinobacterial PCRs were sequenced and compared against the NCBI database using BLASTn.

Diagnostic PCRs for *T. boharti* antennae consistently yielded positive results for both CaSP and *Amycolatopsis*. *Amycolatopsis* PCR products were sequenced and turned out to stem from CaSP, indicating that the Amy\_16S\_1F primer successfully amplified the *T. boharti* CaSP strain despite two mismatches in the primer binding site (as opposed to 3-5 mismatches for all other CaSP strains, 1-2 of which are located towards the 3'-end of the primer). Hence, *T. boharti* specimens that yielded positive PCRs for both CaSP and *Amycolatopsis* were assumed to harbor pure cultures of CaSP, and only CaSP-negative specimens were subsequently screened with *Amycolatopsis*, general actinobacterial, and general eubacterial primers.

Sequences of actinobacterial 16S rRNA from beewolf antennae (NCBI accession numbers KC607731-KC607747) were aligned to the SILVA-ARB SSU database (45) using the SINA aligner (46) and imported into ARB (39). The most closely related strains for each beewolf isolate as well as representative strains of the actinobacterial genera containing isolates were selected for phylogenetic analysis. Furthermore, CaSP strains were included as a reference. The alignment was exported from ARB, and an approximately-maximum-likelihood tree was reconstructed with FastTree 2.1 using the GTR model (40). Local support values were estimated with the Shimodaira-Hasegawa test based on 1,000 resamples without reoptimizing the branch lengths for the resampled alignments (40) (Fig. S5).

Two sequences from antennae of *Philanthus triangulum* and one from *T. boharti* were assigned by BLAST to Proteobacteria (*Serratia* and *Wolbachia*) or Tenericutes (*Spiroplasma*) (NCBI accession numbers KF922849-KF922851). As these sequences probably represent systemic infections of the hosts, including the antennal hemolymph, rather than specialized colonization of the antennal gland reservoirs, they were excluded from phylogenetic analyses.

### **Localization of *Amycolatopsis* in the antennal gland reservoirs of *Philanthus cf. basalis***

To exclude the possibility of contamination and confirm that the *Amycolatopsis* sequences originated from bacteria within the antennal gland reservoirs of *P. cf. basalis*, we performed

fluorescence *in-situ* hybridization (FISH) on the second antenna of a *P. cf. basalis* individual that was positive for *Amycolatopsis*, based on the PCR results for the first antenna. The antenna was fixated in 95% ethanol, embedded in cold-polymerizing resin (Technovit 8100, Heraeus Kulzer) and used for FISH as described earlier (36, 37). The specific fluorescent probes Cy3-SPT177 (specific for '*Ca. S. philanthi*', see 35) and Cy3-Amy\_16S (specific to *Amycolatopsis*; complementary to primer Amy\_16S\_1F) as well as the general eubacterial probe Cy3-EUB338 (47) were used to stain the bacteria within the antennal gland reservoirs (Table S3, Fig. S6). To confirm the specificity of the Cy3-Amy\_16S probe, an antenna of a female *P. triangulum* specimen was prepared for FISH in the same way and stained with the same probes (Fig. S7).

### **Production of AGS by beewolf females with CaSP and with other Actinobacteria, respectively**

Field-collected female beewolves were reared in observation cages as described previously (48) and provided with honey and bees *ad libitum*. Freshly constructed brood cells were checked for the presence of the white antennal gland secretion (AGS) containing the symbiotic bacteria. In the observation cages, the AGS is usually visible with the unaided eye after secretion by the female beewolf to the ceiling of the brood cell (48). Six females did not apply AGS to any of their brood cells (AGS-), whereas the AGS was regularly found in brood cells of all other females (AGS+ females) (Table S8). The AGS- and seven randomly selected AGS+ females were sacrificed, and RNA and DNA were extracted from the antennae using the MasterPure™ Complete DNA and RNA Purification Kit (Epicentre, Madison, WI, USA) according to the manufacturer's instructions. DNA extracts were screened with CaSP- (*Strep\_phil\_fwd3/Act-A19*) and actinobacteria-specific (*Act-S20 /Act-A19*) primer. Products from Act-PCRs were sequenced bidirectionally with or without prior subcloning (using the StrataClone PCR Cloning Kit, Agilent Technologies, La Jolla, CA, USA, according to the manufacturer's instructions). Sequences were aligned with the '*Ca. S. philanthi triangulum*' 16S rRNA sequence to check for similarity and compared with the NCBI database using BLASTn. Sequences that were distinct from CaSP were included in the phylogenetic analyses described above (see Fig. S5).

### **Detection of CaSP in sand surrounding *P. triangulum* nests**

Total DNA was extracted from microorganisms present in the sand of used *P. triangulum* observation cages, following separation by Nicodenz® gradient centrifugation as described previously (49). Briefly, six sand samples (30 g each) were filled up to 50 ml with disruption buffer (0.2 M NaCl, 50 mM Tris-HCl pH 8.0) and thoroughly mixed. Large sand particles were

sedimented by centrifugation at  $100 \times g$  for five minutes at room temperature. The supernatant was transferred into the tubes with Nicodenz® and cells were separated from sand particles at  $10,000 \times g$  for 20 min at 4 °C. Cells were collected from the surface of Nicodenz®, washed three times with PBS and finally, total DNA was extracted with the SoilMaster™ DNA Extraction Kit (Epicentre). The quality of extracted DNA was checked by 1% agarose gel electrophoresis and PCR with the general eubacterial 16S rRNA primers fD1 and rP2. The DNA extracts from the six samples were pooled for bTEFAP.

BTEFAP was done commercially by Research and Testing Laboratory (Lubbock, TX, USA). In total, 8665 reads were generated using primers Gray28F (5'-GAGTTTGATCNTGGCTCAG-3') and Gray519r (5'-GTNTTACNGCGGCKGCTG-3') (50, 51). Generation of the sequencing library was established through one-step PCR with 30 cycles, using a mixture of Hot Start and HotStar high-fidelity Taq polymerases (Qiagen). Sequencing extended from Gray28F, using a Roche 454 FLX instrument with Titanium reagents and procedures at Research and Testing Laboratory (RTL), based upon RTL protocols (<http://www.researchandtesting.com>). All low-quality reads (quality cut-off = 25) and sequences <200 bp or >600 bp were removed following sequencing, which left 7,123 sequences for subsequent analysis. Processing of the high-quality reads was performed using QIIME (52). The sequences were denoised using the denoiser algorithm (53) and subsequently clustered into operational taxonomic units (OTUs) using multiple OTU picking with cdhit (54) and uclust (55) with 97% similarity cut-offs. For each OTU, one representative sequence was extracted (the most abundant) and aligned to the Greengenes core set (available from <http://greengenes.lbl.gov/>) using PyNast (56), with the minimum sequence identity per cent set to 75. Taxonomy was assigned using RDP classifier (57), with a minimum confidence to record assignment set to 0.80. For visualization of the results, OTUs were combined based on phylum-level taxonomic affiliation. To assess the number of CaSP reads within the sample, all high-quality sequences were compared to the '*Ca. S. philanthi triangulum*' 16S reference sequence (GenBank accession number DQ375802) by BLAST, and identical sequences were counted using a custom-made Perl script (Fig. S10). This provided a conservative estimate for the number of CaSP sequences in the samples, as it excluded highly similar sequences containing even low numbers of sequencing errors.

**Table S1:** Collection localities and GenBank accession numbers for beewolf specimens used to reconstruct the host phylogeny.

| Species                                  | Specimen no.            | Sex    | Collection locality |            | NCBI accession number |                |            |                |             |
|------------------------------------------|-------------------------|--------|---------------------|------------|-----------------------|----------------|------------|----------------|-------------|
|                                          |                         |        | Wingless            |            | LWRh                  | EF1a           | 28s        | ArgK           | COI         |
| <i>Philanthus quattuordecimpunctatus</i> | TU-EY-E027              | Male   | Turkey              | JN74246    | KF975656              | KJ556972       | JN674300   | JQ083489       | JQ040297    |
| <i>Philanthus albopilosus</i>            | USA-E56                 | Male   | USA                 | JN674198   | KF975607              | KJ556924       | JN674251   | JQ083441       | JQ040264    |
| <i>Philanthus barbatus</i>               | USA-E18                 | Male   | USA                 | JN674199   | KF975608              | KJ556925       | JN674252   | JQ083442       | JQ040265    |
| <i>Philanthus barbiger</i>               | UT-E15                  | Male   | USA                 | JN674200   | KF975609              | KJ556926       | JN674253   | JQ083443       | JQ040266    |
| <i>Philanthus basilaris</i>              | UT-E6                   | Male   | USA                 | JN74202    | KF975611              | KJ556928       | JN674255   | JQ083445       | JQ040268    |
| <i>Philanthus bicinctus</i>              | USA-E29                 | Male   | USA                 | JN74203    | KF975612              | KJ556929       | JN674256   | JQ083446       | -           |
| <i>Philanthus bilunatus</i>              | USA-BS34                | Male   | USA                 | JN74204    | KF975613              | KJ556930       | JN674257   | JQ083447       | -           |
| <i>Philanthus capensis</i>               | SA-E62                  | Male   | South Africa        | JN74205    | KF975614              | KJ556931       | JN674258   | JQ083448       | JQ040269    |
| <i>Philanthus cf. basalis</i>            | IN-E035                 | Male   | India               | JN674201   | KF975610              | KJ556927       | JN674254   | JQ083444       | JQ040267    |
| <i>Philanthus coarctatus</i>             | MO-1                    | Female | Oman                | JN74206    | KF975615              | KJ556931       | JN674259   | JQ083449       | -           |
| <i>Philanthus coronatus</i>              | m1                      | Male   | Germany             | JN74207    | KF975616              | KJ556932       | JN674260   | JQ083450       | JQ040270    |
| <i>Philanthus crabroniformis</i>         | USA-E10                 | Male   | USA                 | JN74208    | KF975617              | KJ556933       | JN674261   | JQ083451       | JQ040271    |
| <i>Philanthus crotoniphilus</i>          | USA-E39                 | Male   | USA                 | JN74209    | KF975618              | KJ556934       | JN674262   | JQ083452       | -           |
| <i>Philanthus fuscipennis</i>            | SA-E69                  | Male   | South Africa        | JN74210    | KF975619              | KJ556935       | JN674263   | JQ083453       | JQ040272    |
| <i>Philanthus gibbosus</i>               | UT-E188                 | Male   | USA                 | JN74211    | KF975620              | KJ556936       | JN674264   | JQ083454       | -           |
| <i>Philanthus gloriosus</i>              | USA-E60f                | Male   | USA                 | JN74212    | KF975621              | KJ556937       | JN674265   | JQ083455       | JQ040273    |
| <i>Philanthus histrio</i>                | SA-E58                  | Male   | South Africa        | JN74213    | KF975622              | KJ556938       | JN674266   | JQ083456       | JQ040274    |
| <i>Philanthus inversus</i>               | USA-E53b                | Male   | USA                 | JN74214    | KF975623              | KJ556939       | JN674267   | JQ083457       | -           |
| <i>Philanthus lepidus</i>                | CAN-E1                  | Male   | Canada              | JN74215    | KF975624              | KJ556940       | JN674268   | JQ083458       | -           |
| <i>Philanthus loefflingi</i>             | SA-E13                  | Male   | South Africa        | JN74216    | KF975625              | KJ556941       | JN674269   | JQ083459       | JQ040275    |
| <i>Philanthus melanderi</i>              | SA-E79                  | Male   | South Africa        | JN74217    | KF975626              | KJ556942       | JN674270   | JQ083460       | JQ040276    |
| <i>Philanthus multimaculatus</i>         | UT-E76                  | Male   | USA                 | JN74218    | KF975627              | KJ556943       | JN674271   | JQ083461       | JQ040277    |
| <i>Philanthus occidentalis</i>           | CAL-Eth4                | Male   | USA                 | JN74219    | KF975628              | KJ556944       | JN674272   | JQ083462       | JQ040278    |
| <i>Philanthus pacificus</i>              | USA-E19                 | Male   | USA                 | JN74220    | KF975629              | KJ556945       | JN674273   | JQ083463       | JQ040279    |
| <i>Philanthus parkeri</i>                | UT-E45                  | Male   | USA                 | JN74221    | KF975630              | KJ556946       | JN674274   | JQ083464       | JQ040280    |
| <i>Philanthus politus</i>                | JS-32a                  | Male   | USA                 | JN74222    | KF975631              | KJ556947       | JN674275   | JQ083465       | -           |
| <i>Philanthus psyche</i>                 | UT-E154/ *JS-A          | Male   | USA                 | JN74223    | KF975632              | KJ556948*      | JN674276   | JQ083466       | JQ040281    |
| <i>Philanthus pulchellus</i>             | SP-001                  | Male   | Spain               | JN74224    | KF975633              | KJ556949       | JN674277   | JQ083467       | JQ040282    |
| <i>Philanthus pulcher</i>                | USA-E8b                 | Female | USA                 | JN74225    | KF975634              | KJ556950       | JN674278   | JQ083468       | JQ040283    |
| <i>Philanthus pulcherrimus</i>           | IN-E064                 | Male   | India               | JN74226    | KF975635              | KJ556951       | JN674279   | JQ083469       | JQ040284    |
| <i>Philanthus rugosus</i>                | SA-E23                  | Male   | South Africa        | JN74227    | KF975636              | KJ556952       | JN674280   | JQ083470       | JQ040285    |
| <i>Philanthus rutilus</i>                | JS-32                   | Male   | USA                 | JN74228    | KF975637              | KJ556953       | JN674281   | JQ083471       | -           |
| <i>Philanthus sanbornii</i>              | m28                     | Male   | USA                 | JN74229    | KF975638              | KJ556954       | JN674282   | JQ083472       | JQ040286    |
| <i>Philanthus serrulatae</i>             | JS-63                   | Female | USA                 | JN74230    | KF975639              | KJ556955       | JN674283   | -              | -           |
| <i>Philanthus solivagus</i>              | USA-BS36                | Male   | USA                 | JN74231    | KF975640              | KJ556956       | JN674284   | JQ083473       | -           |
| <i>Philanthus sp. CAL</i>                | CAL-Eth14               | Male   | USA                 | JN74233    | KF975642              | KJ556958       | JN674286   | JQ083475       | -           |
| <i>Philanthus sp. IN-E010</i>            | IN-E010                 | Male   | India               | JN74232    | KF975641              | KJ556957       | JN674285   | JQ083474       | JQ040287    |
| <i>Philanthus tarsatus</i>               | JS-44                   | Male   | USA                 | JN74234    | KF975643              | KJ556959       | JN674287   | JQ083476       | -           |
| <i>Philanthus triangulum</i>             | N14/ *JS-B              | Male   | Germany             | JN74235    | KF975644              | KJ556960*      | JN674288   | JQ083477       | JQ040288    |
| <i>Philanthus triangulum diadema</i>     | SA-E8                   | Male   | South Africa        | JN74236    | KF975645              | KJ556961       | JN674289   | JQ083478       | JQ040289    |
| <i>Philanthus turneri</i>                | SA-E116                 | Female | South Africa        | JN74237    | KF975646              | KJ556962       | JN674290   | JQ083479       | JQ040290    |
| <i>Philanthus ventrilabris</i>           | USA-E50                 | Male   | USA                 | JN74238    | KF975647              | KJ556963       | JN674291   | JQ083480       | JQ040291    |
| <i>Philanthus venustus</i>               | Ph02                    | Male   | Greece              | JN74239    | KF975648              | KJ556964       | JN674292   | JQ083481       | -           |
| <i>Philanthus zebhratus</i>              | USA-E25                 | Male   | USA                 | JN74240    | KF975649              | KJ556965       | JN674293   | JQ083482       | JQ040292    |
| <i>Trachypus boharti</i>                 | BR-002                  | Female | Brasil              | JN74250    | KF975650              | KJ556966       | JN674294   | JQ083483       | JQ040293    |
| <i>Trachypus denticollis</i>             | JS-11                   | Male   | Chile               | JN74241    | KF975651              | KJ556967       | JN674295   | JQ083484       | -           |
| <i>Trachypus elongatus</i>               | BR-E032                 | Male   | Brasil              | JN74242    | KF975652              | KJ556968       | JN674296   | JQ083485       | JQ040294    |
| <i>Trachypus flavidus</i>                | BR-E067                 | Male   | Brasil              | JN74243    | KF975653              | KJ556969       | JN674297   | JQ083486       | JQ040295    |
| <i>Trachypus patagonensis</i>            | BR-E092                 | Female | Brasil              | JN74244    | KF975654              | KJ556970       | JN674298   | JQ083487       | JQ040296    |
| <i>Trachypus spec.</i>                   | JS-52                   | Male   | Chile               | JN74245    | KF975655              | KJ556971       | JN674299   | JQ083488       | -           |
| <i>Aphilanthops foxi</i>                 | CAL-Eth10               | Male   | USA                 | JN74247    | KF975657              | KJ556973       | JN674301   | JQ083490       | JQ040298    |
| <i>Bembix amoena/ *B. troglodytes</i>    | -                       | -      | -                   | -          | -                     | -              | -          | -              | EF203767.1* |
| <i>Bicyrtes ventralis</i>                | -                       | -      | -                   | -          | -                     | -              | -          | -              | -           |
| <i>Cerceris rybiensis/Eucerceris</i>     | *Cerc1/**Cerc2/**JS-C   | Female | Germany/USA         | * JN74248  | KF975658 **           | KJ556974***    | AY654460.1 | JQ083491**     | -           |
| <i>Clypeadon laticinctus</i>             | UT-E177/ *BS32a/ **JS-D | Female | USA                 | JN74249    | KF975659 *            | KJ556975**     | JN674302   | JQ083492       | JQ040299    |
| <i>Apis mellifera</i>                    | -                       | -      | -                   | AY703618.1 | U26026.1              | NM_001014993.1 | AY703551.1 | NM_001011603.1 | AF214668.1  |

**Table S2:** Primers used for the amplification and sequencing of host and symbiont genes, and probes for the fluorescence in-situ hybridization to detect CaSP and *Amycolatopsis* in beewolf antennae.

| Target organism | Target sequence      | Primer/probe name | 5'-3' Sequence              | Fwd/rev                       | 5'-mod.                 | Target taxon            | Reference                                   |                                                       |                         |                        |
|-----------------|----------------------|-------------------|-----------------------------|-------------------------------|-------------------------|-------------------------|---------------------------------------------|-------------------------------------------------------|-------------------------|------------------------|
| Primers         | Host                 | Wingless          | beewgfor                    | TGCACNGTSAAGACCTGYTGGA TGAG   | fwd                     | -                       | Apoidea                                     | Danforth et al. 2004                                  |                         |                        |
|                 |                      | Lepwg2a           | ACTIGGCARCAACCARTGGAAATGRCA | rev                           | -                       | Apoidea                 | Brower & DeSalle 1998, Danforth et al. 2004 |                                                       |                         |                        |
|                 |                      | LWRh              | LWRh_Rev1744                | GCDGCTCGRTAYTTHGGATG          | rev                     | -                       | Philanthinae                                | this study                                            |                         |                        |
|                 |                      |                   | LWRhFor4_N                  | GAGAAARAAYA TGCGNGARCAAGC     | fwd                     | -                       | Philanthinae                                | this study (modified from Danforth et al. 2004)       |                         |                        |
|                 |                      | EF1a              | LWRhFor1                    | AATTGCTATTA YGARACNTGGGT      | fwd                     | -                       | Apoidea                                     | Mardulyn & Cameron 1999, Danforth et al. 2004         |                         |                        |
|                 |                      |                   | LWRhRev1                    | ATATGGAGTCCANGCCA TRAA CCA    | rev                     | -                       | Apoidea                                     | Mardulyn & Cameron 1999, Danforth et al. 2004         |                         |                        |
|                 |                      | For1deg           | For1deg                     | GYATCGACAARCGGTACSA TY G      | fwd                     | -                       | Apoidea                                     | Danforth et al. 2003                                  |                         |                        |
|                 |                      |                   | F2Rev1                      | AATCA GCA GCA CCTTTA AGGTGG   | rev                     | -                       | Apoidea                                     | Danforth et al. 2003                                  |                         |                        |
|                 |                      | HaF2for           | HaF2for                     | GGGYAAA GGWTCCTTCAARTATGC     | fwd                     | -                       | Apoidea                                     | Danforth et al. 1999                                  |                         |                        |
|                 |                      |                   | Cho10                       | ACRGGVACKGTYTGHCKATGTG        | rev                     | -                       | Apoidea                                     | Danforth et al. 2003                                  |                         |                        |
|                 |                      | ArgK              | ArgK_Loretta                | TGATCGATGATCACTTCTTTCAA       | fwd                     | -                       | Philanthinae                                | this study                                            |                         |                        |
|                 |                      |                   | ArgK_fw d2                  | GACAGCAARTCTCTGCTGAAGAA       | fwd                     | -                       | Apoidea                                     | Kawakita et al. 2003                                  |                         |                        |
|                 |                      | COI / COII        | ArgK_KLTrev2                | GATKCCA TRTDCA TYTCCTTSA CRGC | rev                     | -                       | Apoidea                                     | www.danforthlab.entomology.cornell.edu/resources.html |                         |                        |
|                 |                      |                   | CO_fw d1                    | TGGAGCHTWTTYAGATTAATAATYCG    | fwd                     | -                       | Philanthinae                                | this study                                            |                         |                        |
|                 |                      | CO_rev2           | CO_rev2                     | TCGWCCAA TWGTRAA TAA TAARA YA | rev                     | -                       | Philanthinae                                | this study                                            |                         |                        |
|                 |                      |                   | CO_LCO                      | GGTCAACAATA TCAAAA GATATTGG   | fwd                     | -                       | insects                                     | Folmer et al. 1994                                    |                         |                        |
|                 |                      | CO_Ben            | CO_Ben                      | GCWACWA CRTAATA KGTATCA TG    | rev                     | -                       | insects                                     | Kronauer et al. 2004                                  |                         |                        |
|                 |                      |                   | 28s rRNA                    | 28s_3665F                     | AGA GAGATTC AAGATGACGTG | fwd                     | -                                           | Apoidea                                               | Cameron & Mardulyn 2001 |                        |
|                 |                      |                   |                             | 28s_4749R                     | GTTACACACTCCTTAGGGGA    | rev                     | -                                           | Apoidea                                               | Danforth et al. 2006    |                        |
|                 |                      | Symbiont          | 16S rRNA                    | fD1                           | AGATTTGATCCTGGCTCAG     | fwd                     | -                                           | Eubacteria                                            | Weisburg et al. 1991    |                        |
|                 |                      |                   |                             | rP2                           | ACGGCTACCTTGTTCGACTT    | rev                     | -                                           | Eubacteria                                            | Weisburg et al. 1991    |                        |
|                 |                      |                   |                             | Spa-2R                        | KTTGCTCGCCRCTAC         | rev                     | -                                           | Eubacteria                                            | Hain et al. 1997        |                        |
|                 |                      |                   |                             | Act-S20                       | CGCGGCTA TCA GCTTGTG    | fwd                     | -                                           | Actinobacteria                                        | Stach et al. 2003       |                        |
|                 |                      |                   |                             | Act-A19                       | CCGTACTCCCA GGGGGGG     | rev                     | -                                           | Actinobacteria                                        | Stach et al. 2003       |                        |
|                 |                      |                   |                             | Strep_phil_fw d3              | CATGGTTRGTGGTGGAAAAGC   | fwd                     | -                                           | Ca. S. philanthi                                      | Kaltenpoth et al. 2006  |                        |
|                 |                      |                   |                             | Amy_16S_1F                    | CCTGACTTTGGGATAAGCCT    | fwd                     | -                                           | <i>Amycolatopsis</i>                                  | this study              |                        |
|                 |                      |                   |                             | Amytop_16S_3R                 | CCTGTGATCCA GCCATTGTAG  | rev                     | -                                           | <i>Amycolatopsis</i>                                  | this study              |                        |
|                 |                      |                   |                             | EF-Tu                         | EF-Tu-1F                | ATYACCAA GGTGCTGCA CG   | fwd                                         | -                                                     | Ca. S. philanthi        | this study             |
| EF-Tu-3F        | TTC AAGTCGAGGCCAA CG |                   |                             |                               | fwd                     | -                       | Ca. S. philanthi                            | this study                                            |                         |                        |
| EF-Tu-2R        | GCCACCTCGTCTTSGAS    |                   |                             |                               | rev                     | -                       | Ca. S. philanthi                            | this study                                            |                         |                        |
| gyrB            | EF-Tu-3R             |                   |                             | GCA CCGGTGATCA GTTCTT         | rev                     | -                       | Ca. S. philanthi                            | this study                                            |                         |                        |
|                 | gyrB-F1              |                   |                             | GAGGTGCTGCTGACCGTCTGCA        | fwd                     | -                       | Ca. S. philanthi                            | Hatano et al. 2003                                    |                         |                        |
|                 | gyrB-F3              |                   |                             | TTCTGTAAGTA CCGA ACTCG        | fwd                     | -                       | Ca. S. philanthi                            | this study                                            |                         |                        |
| gyrA            | gyrB-R3              |                   |                             | SAGCTTGA CCGAGA TGA TCG       | rev                     | -                       | Ca. S. philanthi                            | this study                                            |                         |                        |
|                 | gyrB-R10             |                   |                             | CGACTTGGGGATGATGTCC           | rev                     | -                       | Ca. S. philanthi                            | this study                                            |                         |                        |
|                 | gyrA-5F              |                   |                             | AACTGCTGGCCTTCCAG             | fwd                     | -                       | Ca. S. philanthi                            | this study                                            |                         |                        |
|                 |                      |                   |                             | gyrA-5R                       | AACGCCCA TGGTGTCA CG    | rev                     | -                                           | Ca. S. philanthi                                      | this study              |                        |
| Probes          | Symbiont             |                   |                             | 16S rRNA                      | SPT177                  | CACCAACCA TCGGATCGGTA   | rev                                         | Cy3 or Cy5                                            | Ca. S. philanthi        | Kaltenpoth et al. 2005 |
|                 |                      |                   |                             |                               | Amy_16S                 | AGGCTTA TCCCAAAGTACA GG | rev                                         | Cy3                                                   | <i>Amycolatopsis</i>    | this study             |
|                 |                      |                   | EUB338                      | GCTGCCTCCGTAGGAGT             | rev                     | Cy3                     | Eubacteria                                  | Amann et al. 1990                                     |                         |                        |

**Table S3:** Primer combinations and PCR conditions used for amplification and sequencing of host and symbiont genes.

| Target organism | Target sequence | Forward primer  | Reverse primer | PCR cycle number | Annealing temp. (°C) | Fragment length (bp) | Sequencing primers Forward | Reverse      |
|-----------------|-----------------|-----------------|----------------|------------------|----------------------|----------------------|----------------------------|--------------|
| Host            | 28s             | 28s_3665F       | 28s_4749R      | 35               | 62.9                 | 1080                 | 28s_3665F                  | 28s_4749R    |
|                 | Opsin           | LWRhFor1        | LWRhRev1       | 35               | 58.5                 | 650                  | LWRhFor1                   | -            |
|                 |                 | LWRhFor4_N      | LWRH_Rev1744   | 35               | 53.8                 | 800                  | -                          | Rev1744      |
|                 |                 | LWRhFor1        | LWRH_Rev1744   | 35               | 53.8                 | 1200                 | LWRhFor1                   | LWRH_Rev1744 |
|                 | wingless        | beewgFor        | Lepwg2a        | 35               | 65.6                 | 450                  | beewgFor                   | -            |
|                 | ArgK            | ArgK_fwd2       | ArgK_KLTrev2   | 35               | 50.5                 | 1200                 | ArgK_fwd2                  | ArgK_KLTrev2 |
|                 |                 | ArgK_Loretta    | ArgK_KLTrev2   | 35               | 53.0                 | 700                  | ArgK_Loretta               | -            |
|                 | COI / COII      | CO_LCO          | CO_Ben         | 35               | 49.0                 | 1100                 | CO_LCO                     | CO_Ben       |
|                 |                 | CO_fw d1        | CO_rev2        | 35               | 52.8                 | 1000                 | CO_fw d1                   | CO_rev2      |
|                 | EF1a            | For1deg         | F2Rev1         | 35               | 56.8                 | 1300                 | For1deg                    | F2Rev1       |
| HaF2for         |                 | Cho10           | 35             | 58.0             | 1700                 | -                    | Cho10                      |              |
| Symbiont        | 16S rDNA        | fD1             | Spa-2R         | 32               | 65.0                 | 2090                 | fD1                        | rP2          |
|                 | EF-Tu           | EF-Tu-1F        | EF-Tu-2R       | 35               | 65.0                 | 870                  | EF-Tu-1F                   | -            |
|                 |                 | EF-Tu-3F        | EF-Tu-3R       | 35               | 65.0                 | 1220                 | EF-Tu-3F                   | EF-Tu-3R     |
|                 | gyrB            | gyrB-F1         | gyrB-R3        | 35               | 62.0                 | 740                  | gyrB-F1                    | -            |
|                 |                 | gyrB-F3         | gyrB-R10       | 35               | 62.0                 | 440                  | -                          | gyrB-R10     |
|                 | gyrA            | gyrA-5F         | gyrA-5R        | 35               | 60.0                 | 630                  | gyrA-5F                    | -            |
| Diagnostic PCRs | CaSP 16S        | Strep_phil_fwd3 | Act-A19        | 35               | 68.0                 | 684                  | -                          | -            |
|                 | Amy 16S         | Amy_16S_1F      | Amytop_16S_3R  | 35               | 65.0                 | 1108                 | -                          | -            |
|                 | Amy 16S         | Amy_16S_1F      | Act-A19        | 35               | 65.0                 | 742                  | Amy_16S_1F                 | Act-A19      |

**Table S4:** Model parameters and results of the phylogenetic dating analyses using BEAUti and BEAST. For each analysis, 25 million steps were performed with tree sampling every 2500 steps, and a burnin of 1,000 and a posterior probability limit of 0.5 were used for tree reconstruction.

| Goal                                    | Gene partitions | Codon partitioning | Substitution Base |             |                    | Age priors                 |                  |                                |                                    | Tracer analysis                |                       | Age of symbiosis (mya) |       | Philanthus monophyletic? | Displayed in figure |
|-----------------------------------------|-----------------|--------------------|-------------------|-------------|--------------------|----------------------------|------------------|--------------------------------|------------------------------------|--------------------------------|-----------------------|------------------------|-------|--------------------------|---------------------|
|                                         |                 |                    | model             | frequencies | Clock model        | Starting tree              | Root             | Bembicinae                     | Cerceris+Aphil+Clyp <sup>(1)</sup> | Philanthus+Trachypus           | ESS                   | marg. likelihood       | lower |                          |                     |
| Model and clock choice and optimization | 9               | (1+2, 3)           | GTR               | estimated   | relaxed uncorrlogn | user-specified (ML)        | normal: 140 + 10 | lognormal: 34.1 + 0.5, off: 20 | lognormal: 30 + 0.75, off: 20      | lognormal: 34.1 + 0.5, off: 20 | <i>bad</i>            | -27614.681             | 78.0  | 109.7                    | no                  |
|                                         | 9               | (1+2, 3)           | GTR+I+G           | empirical   | relaxed uncorrlogn | user-specified (ML)        | normal: 140 + 10 | lognormal: 34.1 + 0.5, off: 20 | lognormal: 30 + 0.75, off: 20      | lognormal: 34.1 + 0.5, off: 20 | <i>bad</i>            | -26399.144             | 65.5  | 103.0                    | no                  |
|                                         | 1               | no                 | GTR+I+G           | empirical   | relaxed uncorrlogn | user-specified (ML)        | normal: 140 + 10 | lognormal: 34.1 + 0.5, off: 20 | lognormal: 30 + 0.75, off: 20      | lognormal: 34.1 + 0.5, off: 20 | good                  | -27956.219             | 67.6  | 101.9                    | no                  |
|                                         | 9               | (1+2, 3)           | GTR+I+G           | empirical   | strict             | user-specified (ML)        | normal: 140 + 10 | lognormal: 34.1 + 0.5, off: 20 | lognormal: 30 + 0.75, off: 20      | lognormal: 34.1 + 0.5, off: 20 | <i>bad</i>            | -26426.987             | 44.5  | 87.3                     | yes                 |
|                                         | 9               | (1+2, 3)           | HKY               | empirical   | relaxed uncorrlogn | user-specified (ML)        | normal: 140 + 10 | lognormal: 34.1 + 0.5, off: 20 | lognormal: 30 + 0.75, off: 20      | lognormal: 34.1 + 0.5, off: 20 | good                  | -27942.536             | 80.5  | 109.3                    | no                  |
|                                         | 9               | (1+2, 3)           | HKY               | empirical   | strict             | user-specified (ML)        | normal: 140 + 10 | lognormal: 34.1 + 0.5, off: 20 | lognormal: 30 + 0.75, off: 20      | lognormal: 34.1 + 0.5, off: 20 | good                  | -28078.763             | 69.7  | 107.6                    | yes                 |
|                                         | 9               | (1+2, 3)           | HKY+G             | empirical   | relaxed uncorrlogn | user-specified (ML)        | normal: 140 + 10 | lognormal: 34.1 + 0.5, off: 20 | lognormal: 30 + 0.75, off: 20      | lognormal: 34.1 + 0.5, off: 20 | good                  | -26600.493             | 67.8  | 103.2                    | no                  |
|                                         | 9               | (1+2, 3)           | HKY+G             | estimated   | relaxed uncorrlogn | user-specified (ML)        | normal: 140 + 10 | lognormal: 34.1 + 0.5, off: 20 | lognormal: 30 + 0.75, off: 20      | lognormal: 34.1 + 0.5, off: 20 | good                  | -26548.450             | 68.0  | 103.9                    | no                  |
|                                         | 9               | (1+2, 3)           | HKY+G             | estimated   | relaxed uncorrlogn | user-specified (ML), fixed | normal: 140 + 10 | lognormal: 34.1 + 0.5, off: 20 | lognormal: 30 + 0.75, off: 20      | lognormal: 34.1 + 0.5, off: 20 | good                  | -26547.967             | 68.7  | 107.5                    | no                  |
|                                         | 9               | (1+2, 3)           | HKY+I+G           | empirical   | relaxed uncorrlogn | user-specified (ML)        | normal: 140 + 10 | lognormal: 34.1 + 0.5, off: 20 | lognormal: 30 + 0.75, off: 20      | lognormal: 34.1 + 0.5, off: 20 | good                  | -26475.777             | 65.8  | 102.9                    | no                  |
| Effect of age priors (HKY+G model)      | 9               | (1+2, 3)           | HKY+I+G           | estimated   | relaxed uncorrlogn | user-specified (ML)        | normal: 140 + 10 | lognormal: 34.1 + 0.5, off: 20 | lognormal: 30 + 0.75, off: 20      | lognormal: 34.1 + 0.5, off: 20 | good                  | -26425.094             | 64.7  | 102.0                    | no                  |
|                                         | 9               | (1+2, 3)           | HKY+I+G           | estimated   | relaxed uncorrlogn | user-specified (ML), fixed | normal: 140 + 10 | lognormal: 34.1 + 0.5, off: 20 | lognormal: 30 + 0.75, off: 20      | lognormal: 34.1 + 0.5, off: 20 | good                  | -26424.060             | 66.1  | 106.0                    | no                  |
|                                         | 1               | no                 | HKY+I+G           | empirical   | relaxed uncorrlogn | user-specified (ML)        | normal: 140 + 10 | lognormal: 34.1 + 0.5, off: 20 | lognormal: 30 + 0.75, off: 20      | lognormal: 34.1 + 0.5, off: 20 | good                  | -28075.427             | 66.6  | 100.8                    | no                  |
|                                         | 9               | (1+2, 3)           | HKY+I+G           | empirical   | strict             | user-specified (ML)        | normal: 140 + 10 | lognormal: 34.1 + 0.5, off: 20 | lognormal: 30 + 0.75, off: 20      | lognormal: 34.1 + 0.5, off: 20 | <i>no convergence</i> |                        |       |                          |                     |
|                                         | 9               | (1+2, 3)           | HKY+I+G           | estimated   | strict             | user-specified (ML)        | normal: 140 + 10 | lognormal: 34.1 + 0.5, off: 20 | lognormal: 30 + 0.75, off: 20      | lognormal: 34.1 + 0.5, off: 20 | good                  | -26576.153             | 44.0  | 85.9                     | yes                 |
|                                         | 9               | (1+2, 3)           | HKY+G             | estimated   | relaxed uncorrlogn | user-specified (ML)        | normal: 140 + 10 | lognormal: 34.1 + 0.5, off: 20 | lognormal: 30 + 0.75, off: 20      | lognormal: 34.1 + 0.5, off: 20 | good                  | -26548.450             | 68.0  | 103.9                    | no                  |
|                                         | 9               | (1+2, 3)           | HKY+G             | estimated   | relaxed uncorrlogn | user-specified (ML), fixed | normal: 140 + 10 | lognormal: 34.1 + 0.5, off: 20 | lognormal: 30 + 0.75, off: 20      | lognormal: 34.1 + 0.5, off: 20 | good                  | -26547.967             | 68.7  | 107.5                    | no                  |
|                                         | 9               | (1+2, 3)           | HKY+G             | estimated   | relaxed uncorrlogn | user-specified (ML)        | normal: 140 + 10 | lognormal: 34.1 + 0.5, off: 20 | uniform: 30 - 1000                 | lognormal: 34.1 + 0.5, off: 20 | <i>bad</i>            | -26548.839             | 71.1  | 109.1                    | no                  |
|                                         | 9               | (1+2, 3)           | HKY+G             | estimated   | relaxed uncorrlogn | user-specified (ML)        | normal: 140 + 10 | lognormal: 34.1 + 0.5, off: 20 | lognormal: 30 + 0.75, off: 20      | lognormal: 34.1 + 0.5, off: 20 | good                  | -26548.386             | 61.8  | 96.7                     | no                  |
|                                         | 9               | (1+2, 3)           | HKY+G             | estimated   | relaxed uncorrlogn | user-specified (ML), fixed | normal: 140 + 10 | lognormal: 34.1 + 0.5, off: 20 | lognormal: 30 + 0.75, off: 20      | lognormal: 34.1 + 0.5, off: 20 | good                  | -26548.299             | 65.3  | 104.8                    | no                  |
| Effect of age priors (HKY+I+G model)    | 9               | (1+2, 3)           | HKY+G             | estimated   | relaxed uncorrlogn | user-specified (ML)        | normal: 140 + 10 | lognormal: 34.1 + 0.5, off: 20 | uniform: 30 - 1000                 | lognormal: 34.1 + 0.5, off: 20 | good                  | -26549.133             | 67.1  | 105.2                    | no                  |
|                                         | 9               | (1+2, 3)           | HKY+G             | estimated   | relaxed uncorrlogn | user-specified (ML), fixed | normal: 140 + 10 | lognormal: 34.1 + 0.5, off: 20 | uniform: 30 - 1000                 | lognormal: 34.1 + 0.5, off: 20 | good                  | -26547.686             | 68.3  | 110.0                    | no                  |
|                                         | 9               | (1+2, 3)           | HKY+G             | estimated   | relaxed uncorrlogn | user-specified (ML), fixed | normal: 130 + 10 | lognormal: 34.1 + 0.5, off: 20 | uniform: 30 - 1000                 | lognormal: 34.1 + 0.5, off: 20 | good                  | -26530.420             | 62.8  | 103.5                    | no                  |
|                                         | 9               | (1+2, 3)           | HKY+G             | estimated   | relaxed uncorrlogn | user-specified (ML), fixed | normal: 120 + 10 | lognormal: 34.1 + 0.5, off: 20 | uniform: 30 - 1000                 | lognormal: 34.1 + 0.5, off: 20 | good                  | -26530.465             | 56.7  | 93.9                     | no                  |
|                                         | 9               | (1+2, 3)           | HKY+G             | estimated   | relaxed uncorrlogn | user-specified (ML)        | normal: 140 + 10 | lognormal: 34.1 + 0.5, off: 20 | lognormal: 30 + 0.75, off: 20      | lognormal: 34.1 + 0.5, off: 20 | good                  | -26548.936             | 61.1  | 92.3                     | no                  |
|                                         | 9               | (1+2, 3)           | HKY+G             | estimated   | relaxed uncorrlogn | user-specified (ML)        | normal: 140 + 10 | lognormal: 34.1 + 0.5, off: 20 | lognormal: 30 + 0.75, off: 20      | lognormal: 34.1 + 0.5, off: 20 | <i>bad</i>            | -26548.688             | 41.8  | 64.1                     | no                  |
|                                         | 9               | (1+2, 3)           | HKY+G             | estimated   | relaxed uncorrlogn | user-specified (ML)        | normal: 140 + 10 | lognormal: 34.1 + 0.5, off: 20 | uniform: 30 - 1000                 | lognormal: 34.1 + 0.5, off: 20 | <i>bad</i>            | -26549.694             | 56.3  | 86.4                     | no                  |
|                                         | 9               | (1+2, 3)           | HKY+I+G           | estimated   | relaxed uncorrlogn | user-specified (ML)        | normal: 140 + 10 | lognormal: 34.1 + 0.5, off: 20 | lognormal: 30 + 0.75, off: 20      | lognormal: 34.1 + 0.5, off: 20 | good                  | -26425.094             | 64.7  | 102.0                    | no                  |
|                                         | 9               | (1+2, 3)           | HKY+I+G           | estimated   | relaxed uncorrlogn | user-specified (ML), fixed | normal: 140 + 10 | lognormal: 34.1 + 0.5, off: 20 | lognormal: 30 + 0.75, off: 20      | lognormal: 34.1 + 0.5, off: 20 | good                  | -26424.060             | 66.1  | 106.0                    | no                  |
|                                         | 9               | (1+2, 3)           | HKY+I+G           | estimated   | relaxed uncorrlogn | user-specified (ML)        | normal: 140 + 10 | lognormal: 34.1 + 0.5, off: 20 | uniform: 30 - 1000                 | lognormal: 34.1 + 0.5, off: 20 | <i>bad</i>            | -26425.009             | 68.9  | 109.4                    | no                  |
| Effect of age priors (HKY+I+G model)    | 9               | (1+2, 3)           | HKY+I+G           | estimated   | relaxed uncorrlogn | user-specified (ML)        | normal: 140 + 10 | lognormal: 34.1 + 0.5, off: 20 | lognormal: 30 + 0.75, off: 20      | lognormal: 34.1 + 0.5, off: 20 | good                  | -26425.090             | 60.9  | 97.1                     | no                  |
|                                         | 9               | (1+2, 3)           | HKY+I+G           | estimated   | relaxed uncorrlogn | user-specified (ML), fixed | normal: 140 + 10 | lognormal: 34.1 + 0.5, off: 20 | lognormal: 30 + 0.75, off: 20      | lognormal: 34.1 + 0.5, off: 20 | good                  | -26424.516             | 61.9  | 101.9                    | no                  |
|                                         | 9               | (1+2, 3)           | HKY+I+G           | estimated   | relaxed uncorrlogn | user-specified (ML)        | normal: 140 + 10 | lognormal: 34.1 + 0.5, off: 20 | uniform: 30 - 1000                 | lognormal: 34.1 + 0.5, off: 20 | <i>bad</i>            | -26425.221             | 64.5  | 104.6                    | no                  |
|                                         | 9               | (1+2, 3)           | HKY+I+G           | estimated   | relaxed uncorrlogn | user-specified (ML), fixed | normal: 140 + 10 | lognormal: 34.1 + 0.5, off: 20 | uniform: 30 - 1000                 | lognormal: 34.1 + 0.5, off: 20 | good                  | -26424.123             | 65.2  | 110.5                    | no                  |
|                                         | 9               | (1+2, 3)           | HKY+I+G           | estimated   | relaxed uncorrlogn | user-specified (ML)        | normal: 140 + 10 | lognormal: 34.1 + 0.5, off: 20 | lognormal: 30 + 0.75, off: 20      | lognormal: 34.1 + 0.5, off: 20 | good                  | -26425.166             | 60.1  | 92.8                     | no                  |
|                                         | 9               | (1+2, 3)           | HKY+I+G           | estimated   | relaxed uncorrlogn | user-specified (ML)        | normal: 140 + 10 | lognormal: 34.1 + 0.5, off: 20 | lognormal: 30 + 0.75, off: 20      | lognormal: 34.1 + 0.5, off: 20 | good                  | -26425.043             | 39.4  | 62.8                     | no                  |
|                                         | 9               | (1+2, 3)           | HKY+I+G           | estimated   | relaxed uncorrlogn | user-specified (ML)        | normal: 140 + 10 | lognormal: 34.1 + 0.5, off: 20 | uniform: 30 - 1000                 | lognormal: 34.1 + 0.5, off: 20 | ok                    | -26425.557             | 56.0  | 86.3                     | no                  |

**Table S5:** Infection prevalence of CaSP across 34 different species of beeswolves, as revealed by diagnostic PCRs for CaSP. Diagnostic PCRs for *Amycolatopsis* and general PCRs for Actinobacteria and Eubacteria were used to detect other bacterial symbionts in beewolf antennae.

| Species                                    | Number of specimens (total) | Antennal symbionts |                            |                      |                |             | CaSP infection rate |                                        |
|--------------------------------------------|-----------------------------|--------------------|----------------------------|----------------------|----------------|-------------|---------------------|----------------------------------------|
|                                            |                             | CaSP               | CaSP+others (co-infection) | other Actinobacteria | other bacteria | no bacteria | of all (%)          | of colonized antennae (%) <sup>1</sup> |
|                                            |                             |                    |                            |                      |                |             |                     |                                        |
| <i>Philanthus albopilosus</i>              | 3                           | 2                  |                            | 1                    |                |             | 67                  | 67                                     |
| <i>Philanthus barbiger</i>                 | 28                          | 27                 |                            |                      |                | 1           | 96                  | 100                                    |
| <i>Philanthus cf. basalis</i>              | 2                           | 0                  |                            | 2                    |                |             | 0                   | 0                                      |
| <i>Philanthus basilaris</i>                | 25                          | 25                 |                            |                      |                |             | 100                 | 100                                    |
| <i>Philanthus bicinctus</i>                | 3                           | 3                  |                            |                      |                |             | 100                 | 100                                    |
| <i>Philanthus capensis</i>                 | 1                           | 1                  |                            |                      |                |             | 100                 | 100                                    |
| <i>Philanthus coarctatus</i>               | 1                           | 1                  |                            |                      |                |             | 100                 | 100                                    |
| <i>Philanthus coronatus</i>                | 1                           | 1                  |                            |                      |                |             | 100                 | 100                                    |
| <i>Philanthus crabroniformis</i>           | 2                           | 2                  |                            |                      |                |             | 100                 | 100                                    |
| <i>Philanthus fuscipennis</i>              | 5                           | 5                  |                            |                      |                |             | 100                 | 100                                    |
| <i>Philanthus gibbosus</i>                 | 2                           | 2                  |                            |                      |                |             | 100                 | 100                                    |
| <i>Philanthus gloriosus</i>                | 6                           | 6                  |                            |                      |                |             | 100                 | 100                                    |
| <i>Philanthus histrio</i>                  | 1                           | 1                  |                            |                      |                |             | 100                 | 100                                    |
| <i>Philanthus inversus</i>                 | 1                           | 1                  |                            |                      |                |             | 100                 | 100                                    |
| <i>Philanthus lepidus</i>                  | 1                           | 1                  |                            |                      |                |             | 100                 | 100                                    |
| <i>Philanthus loefflingi</i>               | 6                           | 4                  | 1                          | 1                    |                | 1           | 83                  | 100                                    |
| <i>Philanthus melanderi</i>                | 3                           | 2                  |                            |                      |                | 1           | 67                  | 100                                    |
| <i>Philanthus multimaculatus</i>           | 19                          | 17                 |                            |                      |                | 2           | 89                  | 100                                    |
| <i>Philanthus pacificus</i>                | 3                           | 3                  |                            |                      |                |             | 100                 | 100                                    |
| <i>Philanthus parkeri</i>                  | 36                          | 36                 |                            |                      |                |             | 100                 | 100                                    |
| <i>Philanthus psyche</i>                   | 15                          | 15                 |                            |                      |                |             | 100                 | 100                                    |
| <i>Philanthus pulchellus</i>               | 2                           | 2                  |                            |                      |                |             | 100                 | 100                                    |
| <i>Philanthus pulcher</i>                  | 4                           | 4                  |                            |                      |                |             | 100                 | 100                                    |
| <i>Philanthus rugosus</i>                  | 4                           | 4                  |                            |                      |                |             | 100                 | 100                                    |
| <i>Philanthus triangulum</i>               | 68                          | 53                 | 2                          | 6                    | 2              | 7           | 81                  | 93                                     |
| <i>Philanthus triangulum diadema</i>       | 7                           | 6                  |                            |                      |                | 1           | 86                  | 100                                    |
| <i>Philanthus turneri</i>                  | 1                           | 1                  |                            |                      |                |             | 100                 | 100                                    |
| <i>Philanthus ventilabris</i>              | 6                           | 6                  |                            |                      |                |             | 100                 | 100                                    |
| <i>Philanthus venustus</i>                 | 2                           | 2                  |                            |                      |                |             | 100                 | 100                                    |
| <i>Philanthus zebratus</i>                 | 2                           | 2                  |                            |                      |                |             | 100                 | 100                                    |
| <i>Trachypus boharti</i>                   | 68                          | 66                 |                            | 1                    | 1              |             | 97                  | 99                                     |
| <i>Trachypus elongatus</i>                 | 5                           | 5                  |                            |                      |                |             | 100                 | 100                                    |
| <i>Trachypus patagonensis</i>              | 2                           | 2                  |                            |                      |                |             | 100                 | 100                                    |
| <i>Philanthinus quattuordecimpunctatus</i> | 3                           | 3                  |                            |                      |                |             | 100                 | 100                                    |
| <b>Total</b>                               | <b>338</b>                  | <b>311</b>         | <b>3</b>                   | <b>11</b>            | <b>4</b>       | <b>12</b>   | <b>93</b>           | <b>98</b>                              |

<sup>1</sup>excluding all antennae without Actinobacteria ("no bacteria" and "other bacteria"), as the latter probably represented systemic infections with *Wolbachia*, *Spiroplasma*, or *Serratia*



**Table S6:** Collection localities and GenBank accession numbers for beewolf specimens used to reconstruct the symbiont phylogeny.

| Genus                 | Species               | Specimen no. | Sex               | Collection locality | GenBank accession numbers |          |          |          |
|-----------------------|-----------------------|--------------|-------------------|---------------------|---------------------------|----------|----------|----------|
|                       |                       |              |                   |                     | 16S                       | EF-G/-Tu | gyrB     | gyrA     |
| <i>Philanthus</i>     | <i>albopilosus</i>    | UT-E116      | female            | Utah, USA           | KC607720                  | KC607680 | KC607639 | KC607532 |
|                       | <i>barbatus</i>       | USA-BS-39    | female            | USA                 |                           |          |          | KC607533 |
|                       | <i>barbiger</i>       | UT-E8        | female            | Utah, USA           | DQ375779                  | KC607681 | KC607640 | KC607538 |
|                       |                       | UT-E290      | female            | Utah, USA           |                           |          |          | KC607535 |
|                       |                       | UT-E295      | female            | Utah, USA           |                           |          |          | KC607536 |
|                       |                       | UT-E296      | female            | Utah, USA           |                           |          |          | KC607537 |
|                       |                       | USA-E55      | female            | Utah, USA           |                           |          |          | KC607534 |
|                       | <i>basilaris</i>      | UT-E3        | female            | Utah, USA           | DQ375780                  | KC607682 | KC607641 | KC607540 |
|                       |                       | UT-E4        | female            | Utah, USA           | KC607721                  | KC607683 | KC607642 | KC607545 |
|                       |                       | UT-E1        | female            | Utah, USA           |                           |          |          | KC607539 |
|                       |                       | UT-E349      | female            | Utah, USA           |                           |          |          | KC607543 |
|                       |                       | UT-E333      | female            | Utah, USA           |                           |          |          | KC607541 |
|                       |                       | UT-E334      | female            | Utah, USA           |                           |          |          | KC607542 |
|                       |                       | UT-E350      | female            | Utah, USA           |                           |          |          | KC607544 |
|                       | <i>bicinctus</i>      | USA-E32      | female            | Utah, USA           | DQ375781                  | KC607684 | KC607643 | KC607546 |
|                       | <i>bilunatus</i>      | USA-BS-33    | female            | USA                 | KC607722                  | KC607685 | KC607644 | KC607547 |
|                       | <i>capensis</i>       | SA-E56       | female            | WCP, South Africa   | DQ375782                  | KC607686 | KC607645 | KC607548 |
|                       | <i>coarctatus</i>     | coarct2      | female            | Oman                | DQ375783                  | KC607687 | KC607646 | KC607549 |
|                       | <i>coronatus</i>      | coronat      | female            | Germany             | DQ375784                  | KC607688 | KC607647 | KC607550 |
|                       | <i>crabroniformis</i> | USA-E20      | female            | Wyoming, USA        | DQ375785                  | KC607689 | KC607648 | KC607551 |
|                       | <i>crotoniphilus</i>  | USA-BS-40    | female            | USA                 | DQ375786                  |          |          | KC607552 |
|                       | <i>fuscipennis</i>    | SA-E19       | female            | ECP, South Africa   |                           | KC607690 | KC607649 | KC607553 |
|                       |                       | SA-E45       | female            | ECP, South Africa   |                           |          |          | KC607554 |
|                       |                       | SA-E37       | female            | ECP, South Africa   | DQ375787                  |          |          |          |
|                       | <i>gibbosus</i>       | gib1         | female            | Utah, USA           |                           | KC607691 |          |          |
|                       |                       | gib4         | female            | Utah, USA           | DQ375788                  |          | KC607650 | KC607555 |
|                       |                       | UT-E196      | female            | Utah, USA           |                           |          |          | KC607556 |
|                       |                       | UT-E284      | female            | Utah, USA           |                           |          |          | KC607557 |
|                       |                       | WI-003       | female            | Wisconsin, USA      |                           |          |          | KC607558 |
|                       |                       | WI-004       | female            | Wisconsin, USA      |                           |          |          | KC607559 |
|                       | <i>gloriosus</i>      | USA-E59a     | female            | Utah, USA           |                           | KC607692 | KC607651 | KC607560 |
|                       |                       | USA-E59c     | female            | Utah, USA           | DQ375789                  |          |          |          |
|                       |                       | UT-E71       | female            | Utah, USA           |                           |          |          | KC607561 |
|                       |                       | UT-E72       | female            | Utah, USA           |                           |          |          | KC607562 |
|                       | <i>histrion</i>       | SA-E57       | female            | WCP, South Africa   | DQ375790                  | KC607693 | KC607652 | KC607563 |
|                       | <i>inversus</i>       | UT-E50       | female            | Utah, USA           | DQ375791                  | KC607694 | KC607653 | KC607564 |
|                       |                       | UT-E90       | female            | Utah, USA           |                           |          |          | KC607565 |
|                       | <i>lepidus</i>        | lep1         | female            | USA                 | DQ375792                  | KC607695 |          |          |
|                       |                       | lep3         | female            | USA                 |                           |          | KC607654 | KC607566 |
|                       | <i>loefflingi</i>     | SA-E40       | female            | ECP, South Africa   |                           | KC607696 | KC607655 | KC607567 |
|                       |                       | SA-E41       | female            | ECP, South Africa   |                           |          |          | KC607568 |
|                       |                       | SA-E52       | female            | WCP, South Africa   | DQ375793                  |          |          |          |
|                       | SA-E87                | female       | WCP, South Africa | KC607723            | KC607697                  | KC607656 | KC607569 |          |
| <i>melanderi</i>      | USA-E1a               | female       | Utah, USA         |                     | KC607698                  | KC607657 |          |          |
| <i>multimaculatus</i> | USA-E1d               | female       | Utah, USA         | DQ375794            |                           |          |          |          |
|                       | USA-E1c               | female       | Utah, USA         |                     |                           |          | KC607570 |          |
|                       | UT-E25                | female       | Utah, USA         |                     |                           |          | KC607572 |          |
|                       | UT-E102               | female       | Utah, USA         |                     |                           |          | KC607571 |          |
|                       | UT-E254               | female       | Utah, USA         |                     |                           |          | KC607573 |          |
| <i>pacificus</i>      | UT-E221               | female       | Wyoming, USA      | DQ375795            | KC607699                  | KC607658 | KC607574 |          |
| <i>parkeri</i>        | USA-E43-1             | female       | Utah, USA         | DQ375796            | KC607700                  | KC607659 | KC607575 |          |
|                       | UT-E23                | female       | Utah, USA         |                     |                           |          | KC607576 |          |
|                       | UT-E24                | female       | Utah, USA         |                     |                           |          | KC607577 |          |
|                       | UT-E300               | female       | Utah, USA         |                     |                           |          | KC607578 |          |
| <i>politus</i>        | USA-BS-29             | female       | USA               | DQ375797            | KC607701                  | KC607660 | KC607579 |          |
| <i>psyche</i>         | USA-E44-1             | female       | Utah, USA         | DQ375798            | KC607702                  | KC607661 |          |          |
|                       | USA-E44-2             | female       | Utah, USA         |                     |                           |          | KC607580 |          |
| <i>pulchellus</i>     | SP-002                | female       | Spain             | KC607724            | KC607703                  | KC607662 | KC607581 |          |
| <i>pulcher</i>        | USA-E6                | female       | Wyoming, USA      | DQ375799            | KC607704                  | KC607663 | KC607582 |          |
| <i>rugosus</i>        | SA-E29                | female       | ECP, South Africa | DQ375800            | KC607705                  | KC607664 | KC607583 |          |
| <i>sanbornii</i>      | USA-BS-37             | female       | USA               | KC607725            | KC607706                  | KC607665 | KC607584 |          |
| <i>solivagus</i>      | USA-BS-35             | female       | USA               | KC607726            | KC607707                  | KC607666 | KC607585 |          |

**Table S6 continued:** Collection localities and GenBank accession numbers for beewolf specimens used to reconstruct the symbiont phylogeny.

| Genus               | Species                       | Specimen no.      | Sex              | Collection locality | GenBank accession numbers |           |           |            |          |
|---------------------|-------------------------------|-------------------|------------------|---------------------|---------------------------|-----------|-----------|------------|----------|
|                     |                               |                   |                  |                     | 16S                       | EF-G/-Tu  | gyrB      | gyrA       |          |
| <i>Philanthus</i>   | <i>tarsatus</i>               | USA-BS-25         | female           | USA                 | DQ375801                  | KC607708  | KC607667  | KC607586   |          |
|                     |                               | SA-E1             | female           | KZN, South Africa   |                           | KC607710  | KC607669  | KC607587   |          |
|                     | <i>triangulum diadema</i>     | SA-E20            | female           | ECP, South Africa   | DQ375803                  |           |           | KC607591   |          |
|                     |                               | SA-E46            | female           | ECP, South Africa   |                           |           |           | KC607592   |          |
|                     |                               | SA-E65            | female           | WCP, South Africa   |                           |           |           | KC607593   |          |
|                     |                               | SA-E89            | female           | WCP, South Africa   |                           |           |           | KC607594   |          |
|                     |                               | SA-E115           | female           | WCP, South Africa   |                           |           |           | KC607590   |          |
|                     |                               | <i>triangulum</i> | S1_Ant           | female              | Germany                   |           | KC607709  | KC607668   |          |
|                     |                               |                   | Ant7             | female              | Germany                   | DQ375802  |           |            |          |
|                     |                               |                   | S4_Ant           | female              | Germany                   |           |           |            | KC607599 |
|                     |                               |                   | U3_Ant           | female              | Ukraine                   |           |           |            | KC607602 |
|                     |                               |                   | D10_Ant          | female              | Germany                   |           |           |            | KC607588 |
|                     |                               |                   | D11_Ant          | female              | Germany                   |           |           |            | KC607589 |
|                     |                               |                   | F80_Ant          | female              | Germany                   |           |           |            | KC607595 |
|                     |                               |                   | F85_Ant          | female              | Germany                   |           |           |            | KC607596 |
|                     |                               |                   | F88_Ant          | female              | Germany                   |           |           |            | KC607597 |
|                     |                               |                   | F90_Ant          | female              | Germany                   |           |           |            | KC607598 |
|                     | R1_Ant                        | female            | Germany          | KC607733            |                           |           |           |            |          |
|                     | R2_Ant                        | female            | Germany          | KC607734            |                           |           |           |            |          |
|                     | TU-M019                       | female            | Turkey           |                     |                           |           | KC607600  |            |          |
|                     | TU-M065                       | female            | Turkey           |                     |                           |           | KC607601  |            |          |
|                     | <i>turneri</i>                | SA-E116           | female           | WCP, South Africa   | KC607727                  | KC607711  | KC607670  | KC607603   |          |
|                     |                               | UT-E70            | female           | Utah, USA           | DQ375803                  | KC607712  | KC607671  | KC607605   |          |
|                     |                               | UT-E91            | female           | Utah, USA           |                           |           |           | KC607606   |          |
|                     |                               | UT-E92            | female           | Utah, USA           |                           |           |           | KC607607   |          |
|                     | <i>ventilabris</i>            | UT-E164           | female           | Utah, USA           | KC607728                  | KC607713  | KC607672  | KC607604   |          |
|                     |                               | ven1              | female           | Greece              | DQ375804                  |           |           | KC607608   |          |
| ven2                |                               | female            | Greece           |                     | KC607714                  | KC607673  |           |            |          |
| <i>venustus</i>     | USA-BS-30                     | female            | USA              | DQ375805            | KC607715                  | KC607674  | KC607609  |            |          |
|                     | IN-E038                       | female            | Karnataka, India | KC607738            |                           |           |           |            |          |
|                     | IN-E043                       | female            | Karnataka, India | KC607739            |                           |           |           |            |          |
| <i>Trachypus</i>    | <i>boharti</i>                | BR-003            | female           | Brasil              | GU721170                  | KC607716  | KC607675  | KC607610   |          |
|                     |                               | BR-M001           | female           | Brasil              |                           |           |           | KC607611   |          |
|                     |                               | BR-M002           | female           | Brasil              |                           |           |           | KC607612   |          |
|                     |                               | BR-M004           | female           | Brasil              |                           |           |           | KC607613   |          |
|                     |                               | BR-M011           | female           | Brasil              |                           |           |           | KC607614   |          |
|                     |                               | BR-M019           | female           | Brasil              |                           |           |           | KC607615   |          |
|                     |                               | BR-M130           | female           | Brasil              |                           |           |           | KC607616   |          |
|                     |                               | BR-M132           | female           | Brasil              |                           |           |           | KC607617   |          |
|                     |                               | BR-M133           | female           | Brasil              |                           |           |           | KC607618   |          |
|                     |                               | BR-M135           | female           | Brasil              |                           |           |           | KC607619   |          |
|                     |                               | BR-M136           | female           | Brasil              |                           |           |           | KC607620   |          |
|                     |                               | BR-M139           | female           | Brasil              |                           |           |           | KC607621   |          |
|                     |                               | BR-M140           | female           | Brasil              |                           |           |           | KC607622   |          |
|                     |                               | BR-M141           | female           | Brasil              |                           |           |           | KC607623   |          |
|                     |                               | BR-M142           | female           | Brasil              |                           |           |           | KC607624   |          |
|                     |                               | BR-M143           | female           | Brasil              |                           |           |           | KC607625   |          |
|                     |                               | BR-M144           | female           | Brasil              |                           |           |           | KC607626   |          |
|                     |                               | BR-M145           | female           | Brasil              |                           |           |           | KC607627   |          |
|                     | BR-M149                       | female            | Brasil           |                     |                           |           | KC607628  |            |          |
|                     | BR-M151                       | female            | Brasil           |                     |                           |           | KC607629  |            |          |
|                     | <i>denticollis elongatus</i>  | W-Ant1            | female           | Chile               | GU721171                  | KC607717  | KC607676  | KC607630   |          |
|                     |                               | BR-M083           | female           | Brasil              | KC607729                  | KC607718  | KC607677  | KC607632   |          |
|                     |                               | BR-M091           | female           | Brasil              |                           |           |           | KC607631   |          |
|                     |                               | BR-M167           | female           | Brasil              |                           |           |           | KC607633   |          |
|                     |                               | BR-M168           | female           | Brasil              |                           |           |           | KC607634   |          |
|                     |                               | BR-M170           | female           | Brasil              |                           |           |           | KC607635   |          |
|                     | <i>patagonensis</i>           | BR-M084           | female           | Brasil              |                           |           |           | KC607636   |          |
| BR-M092             |                               | female            | Brasil           | KC607730            | KC607719                  | KC607678  | KC607637  |            |          |
| <i>Philanthinus</i> | <i>quattuordecimpunctatus</i> | TU-EY-E021        | female           | Turkey              | JN104609                  | KC607679  | KC607638  | JN104610   |          |
|                     |                               | TU-EY-E022        | female           | Turkey              | JN104609                  |           |           | JN104610   |          |
|                     |                               | TU-EY-E023        | female           | Turkey              | JN104609                  |           |           | JN104610   |          |
| <b>Total</b>        | <b>42</b>                     | <b>124</b>        |                  |                     | <b>48</b>                 | <b>41</b> | <b>41</b> | <b>109</b> |          |

**Table S7:** GenBank accession numbers for actinobacterial sequences included in the phylogenetic analyses.

| Genus                    | Species                                          | Strain     | 16S                     | gyrB            | gyrA         | EF-G/-Tu          |
|--------------------------|--------------------------------------------------|------------|-------------------------|-----------------|--------------|-------------------|
| <i>Frankia</i>           | <i>alni</i>                                      | ACN14a     | NC_008278               | NC_008278       | NC_008278    | NC_008278         |
| <i>Streptomyces</i>      | <i>abikoensis</i> (=luteoverticillatus)          | DSM 40831  | KC954556                | KC954562        | KC954559     | KC954568/KC954565 |
| <i>Streptomyces</i>      | <i>albus</i>                                     | J1074      | AJ621602 <sup>(1)</sup> | NZ_DS999645     | NZ_DS999645  | NZ_DS999645       |
| <i>Streptomyces</i>      | <i>auratus</i>                                   | AGR0001    | -                       | NZ_JH725387     | NZ_JH725387  | NZ_JH725387       |
| <i>Streptomyces</i>      | <i>avermitilis</i>                               | MA4680     | NC_003155               | NC_003155       | NC_003155    | NC_003155         |
| <i>Streptomyces</i>      | <i>bingchengensis</i>                            | BCW1       | NC_016582               | NC_016582       | NC_016582    | NC_016582         |
| <i>Streptomyces</i>      | <i>cattleya</i>                                  | NRRL 8057  | NC_016111               | NC_016111       | NC_016111    | NC_016111         |
| <i>Streptomyces</i>      | <i>clavuligerus</i>                              | ATCC 27064 | NZ_CM001015             | NZ_CM001015     | NZ_CM001015  | NZ_CM001015       |
| <i>Streptomyces</i>      | <i>coelicolor</i>                                | A3(2)      | NC_003888               | NC_003888       | NC_003888    | NC_003888         |
| <i>Streptomyces</i>      | <i>flavogriseus</i>                              | ATCC 33331 | NC_016114               | NC_016114       | NC_016114    | NC_016114         |
| <i>Streptomyces</i>      | <i>ghanaensis</i>                                | ATCC 14672 | AJ781384 <sup>(1)</sup> | NZ_DS999641     | NZ_DS999641  | NZ_DS999641       |
| <i>Streptomyces</i>      | <i>griseoflavus</i>                              | Tu4000     | AJ781322 <sup>(1)</sup> | NZ_GG657758     | NZ_GG657758  | NZ_GG657758       |
| <i>Streptomyces</i>      | <i>griseus</i> subsp. <i>griseus</i>             | NBRC 13350 | NC_010572               | NC_010572       | NC_010572    | NC_010572         |
| <i>Streptomyces</i>      | <i>griseus</i>                                   | XylebKG1   | NZ_GL877172             | NZ_GL877172     | NZ_GL877172  | NZ_GL877172       |
| <i>Streptomyces</i>      | <i>hygroscopicus</i> subsp. <i>jinggangensis</i> | 5008       | NC_017765               | NC_017765       | NC_017765    | NC_017765         |
| <i>Streptomyces</i>      | <i>hygroscopicus</i>                             | ATCC 53653 | EF408736                | NZ_ACEX01000401 | ACEX01000401 | NZ_ACEX01000355   |
| <i>Streptomyces</i>      | <i>lividans</i>                                  | TK24       | AY039029                | NZ_GG657756     | NZ_GG657756  | NZ_GG657756       |
| <i>Streptomyces</i>      | <i>mutabilis</i>                                 | DSM 40169  | KC954557                | KC954563        | KC954560     | KC954569/KC954566 |
| <i>Streptomyces</i>      | <i>pristinaespiralis</i>                         | ATCC 25486 | -                       | NZ_CM000950     | NZ_CM000950  | NZ_CM000950       |
| <i>Streptomyces</i>      | <i>ramulosus</i>                                 | DSM 40100  | KC954558                | KC954564        | KC954561     | KC954570/KC954567 |
| <i>Streptomyces</i>      | <i>roseosporus</i>                               | NRRL 11379 | NZ_ABYX01000136         | NZ_ABYX01000145 | ABYX01000145 | NZ_ABYX01000157   |
| <i>Streptomyces</i>      | <i>scabiei</i>                                   | 87.22      | NC_013929               | NC_013929       | NC_013929    | NC_013929         |
| <i>Streptomyces</i>      | <i>sp.</i>                                       | SPB78      | -                       | NZ_GG657742     | NZ_GG657742  | NZ_GG657742       |
| <i>Streptomyces</i>      | <i>sp.</i>                                       | SPB74      | -                       | NZ_GG770539     | NZ_GG770539  | NZ_GG770539       |
| <i>Streptomyces</i>      | <i>sp.</i>                                       | SirexAAE   | NC_015953               | NC_015953       | NC_015953    | NC_015953         |
| <i>Streptomyces</i>      | <i>sp.</i>                                       | Tu6071     | NZ_CM001165             | NZ_CM001165     | NZ_CM001165  | NZ_CM001165       |
| <i>Streptomyces</i>      | <i>sp.</i>                                       | C          | -                       | NZ_ACEW01000329 | ACEW01000329 | NZ_ACEW01000364   |
| <i>Streptomyces</i>      | <i>sp.</i>                                       | Mg1        | -                       | NZ_ABJF01000426 | ABJF01000426 | NZ_ABJF01000117   |
| <i>Streptomyces</i>      | <i>sviceus</i>                                   | ATCC 29083 | AB184559 <sup>(1)</sup> | NZ_CM000951     | NZ_CM000951  | NZ_CM000951       |
| <i>Streptomyces</i>      | <i>venezuelae</i>                                | ATCC 10712 | NC_018750               | NC_018750       | NC_018750    | NC_018750         |
| <i>Streptomyces</i>      | <i>violaceusniger</i>                            | Tu 4113    | NC_015957               | NC_015957       | NC_015957    | NC_015957         |
| <i>Streptomyces</i>      | <i>viridochromogenes</i>                         | DSM 40736  | AB045858 <sup>(1)</sup> | NZ_ACEZ01000135 | ACEZ01000135 | NZ_ACEZ01000155   |
| <i>Streptosporangium</i> | <i>roseum</i>                                    | DSM 43021  | NC_013595               | NC_013595       | NC_013595    | NC_013595         |

<sup>(1)</sup> sequence from another strain of the same species used, because 16S rRNA sequence for the same strain was not available

**Table S8:** Antennal symbionts of field-collected beewolf females (*Philanthus triangulum*) applying (AGS+) or not applying (AGS-) visible amounts of antennal gland secretion to their brood cells under laboratory conditions.

| Specimen number | Age (days) | AGS visible | Number of brood cells | Brood cells with visible AGS number | Brood cells with visible AGS proportion (%) | Antennal symbionts (diagnostic PCRs and sequencing)               | BLAST identity |
|-----------------|------------|-------------|-----------------------|-------------------------------------|---------------------------------------------|-------------------------------------------------------------------|----------------|
| 10b             | 51         | +           | 39                    | 29                                  | 74.4                                        | CaSP                                                              |                |
| 12a             | 56         | +           | 48                    | 42                                  | 87.5                                        | CaSP                                                              |                |
| 15d             | 57         | +           | 36                    | 30                                  | 83.3                                        | CaSP                                                              |                |
| 24c             | 24         | +           | 9                     | 7                                   | 77.8                                        | CaSP                                                              |                |
| 25c             | 46         | +           | 12                    | 12                                  | 100                                         | CaSP                                                              |                |
| 29c             | 36         | +           | 32                    | 26                                  | 81.3                                        | CaSP                                                              |                |
| 04c             | 53         | +           | 18                    | 11                                  | 61.1                                        | <i>Rhodococcus baikonurensis</i> ,<br><i>Nocardioides simplex</i> | 100%<br>100%   |
| 08a             | 18         | -           | 2                     | 0                                   | 0                                           | none detected                                                     |                |
| 29b             | 60         | -           | 35                    | 0                                   | 0                                           | <i>Streptomyces pluricologrescens</i>                             | 99%            |
| 04b             | 63         | -           | 17                    | 0                                   | 0                                           | <i>Streptomyces flavofuscus</i>                                   | 100%           |
| 19a             | 31         | -           | 5                     | 0                                   | 0                                           | <i>Streptomyces ramulosus</i>                                     | 99%            |
| 10c             | 44         | -           | 23                    | 0                                   | 0                                           | <i>Streptomyces rochei</i>                                        | 99%            |
| 15c             | 34         | -           | 20                    | 0                                   | 0                                           | <i>Streptomyces phaeochromogenes</i>                              | 99%            |

**Table S9:** Symbiont establishment and transmission success upon artificial infection with native (CaSP) and non-native (Amy) symbionts.

| Experimental infection treatment | Individual | Life span (days) | Antennal symbionts PCR |     |      |     | Number of brood cells | Brood cells with visible AGS (%) | Number of cocoons tested | GC-MS antibiotics-positive (%) | Diagnostic PCRs |             |
|----------------------------------|------------|------------------|------------------------|-----|------|-----|-----------------------|----------------------------------|--------------------------|--------------------------------|-----------------|-------------|
|                                  |            |                  | CaSP                   | Amy | CaSP | Amy |                       |                                  |                          |                                | CaSP pos (%)    | Amy pos (%) |
| CaSP                             | HT-W07     | 21               | +                      | -   | +    | -   | 7                     | 57.1                             | 6                        | 50.0                           | 33.3            | 16.7        |
|                                  | HT-W10     | 38               | +                      | -   | +    | -   | 20                    | 80                               | 20                       | 70.0                           | 55.0            | 0.0         |
|                                  | HT-W15     | 38               | +                      | -   | N/A  | N/A | 39                    | 58.9                             | 34                       | 88.2                           | 61.8            | 35.3        |
|                                  | HT-W21     | 31               | +                      | -   | +    | -   | 8                     | 62.5                             | 8                        | 75.0                           | 50.0            | 0.0         |
|                                  | HT-W32     | 42               | +                      | -   | -    | (+) | 17                    | 64.7                             | 14                       | 85.7                           | 57.1            | 42.9        |
| Amy                              | HT-W01     | 41               | -                      | +   | -    | +   | 6                     | 0                                | 6                        | 0.0                            | 50.0            | 16.7        |
|                                  | HT-W11     | 24               | -                      | +   | -    | (+) | 19                    | 0                                | 18                       | 0.0                            | 27.8            | 16.7        |
|                                  | HT-W14     | 45               | +                      | +   | +    | -   | 34                    | 0                                | 25                       | 20.0                           | 4.0             | 8.0         |
|                                  | HT-W18     | 13               | -                      | -   | -    | +   | 15                    | 0                                | 14                       | 0.0                            | 7.1             | 7.1         |
|                                  | HT-W23     | 11               | -                      | +   | -    | (+) | 20                    | 0                                | 14                       | 0.0                            | 14.3            | 0.0         |
|                                  | HT-W29     | 22               | -                      | +   | -    | -   | 8                     | 0                                | 7                        | 0.0                            | 0.0             | 14.3        |

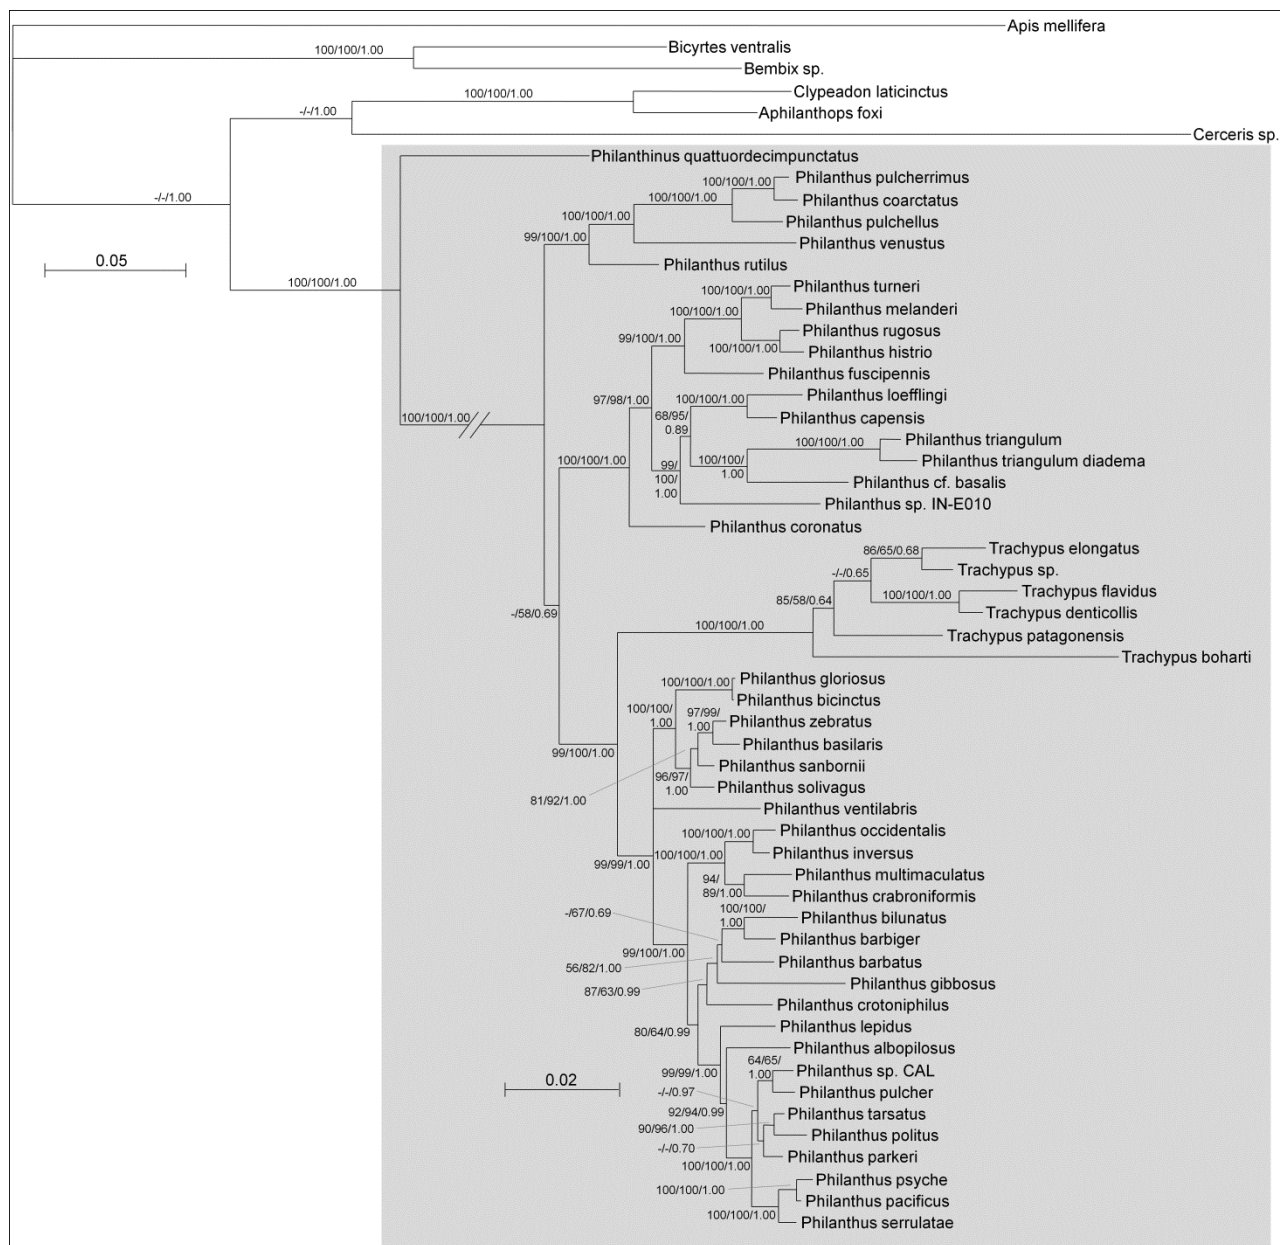

**Figure S1:** Reconstruction of phylogenetic relationships among Philanthini digger wasps. The phylogeny is based on a concatenated alignment of 5521 bp of *28S*, *lwrh*, *argK*, *wnt*, *ef1a*, and *coxI*. Bootstrap values (>50%) from maximum-parsimony (MP, 1,000 replicates) and maximum likelihood (ML, 10,000 replicates) analyses as well as Bayesian posterior probabilities (>0.5) are provided at the nodes. Taxa with antennal *Streptomyces* symbionts are highlighted with grey background. Scale bars represent substitutions per site.

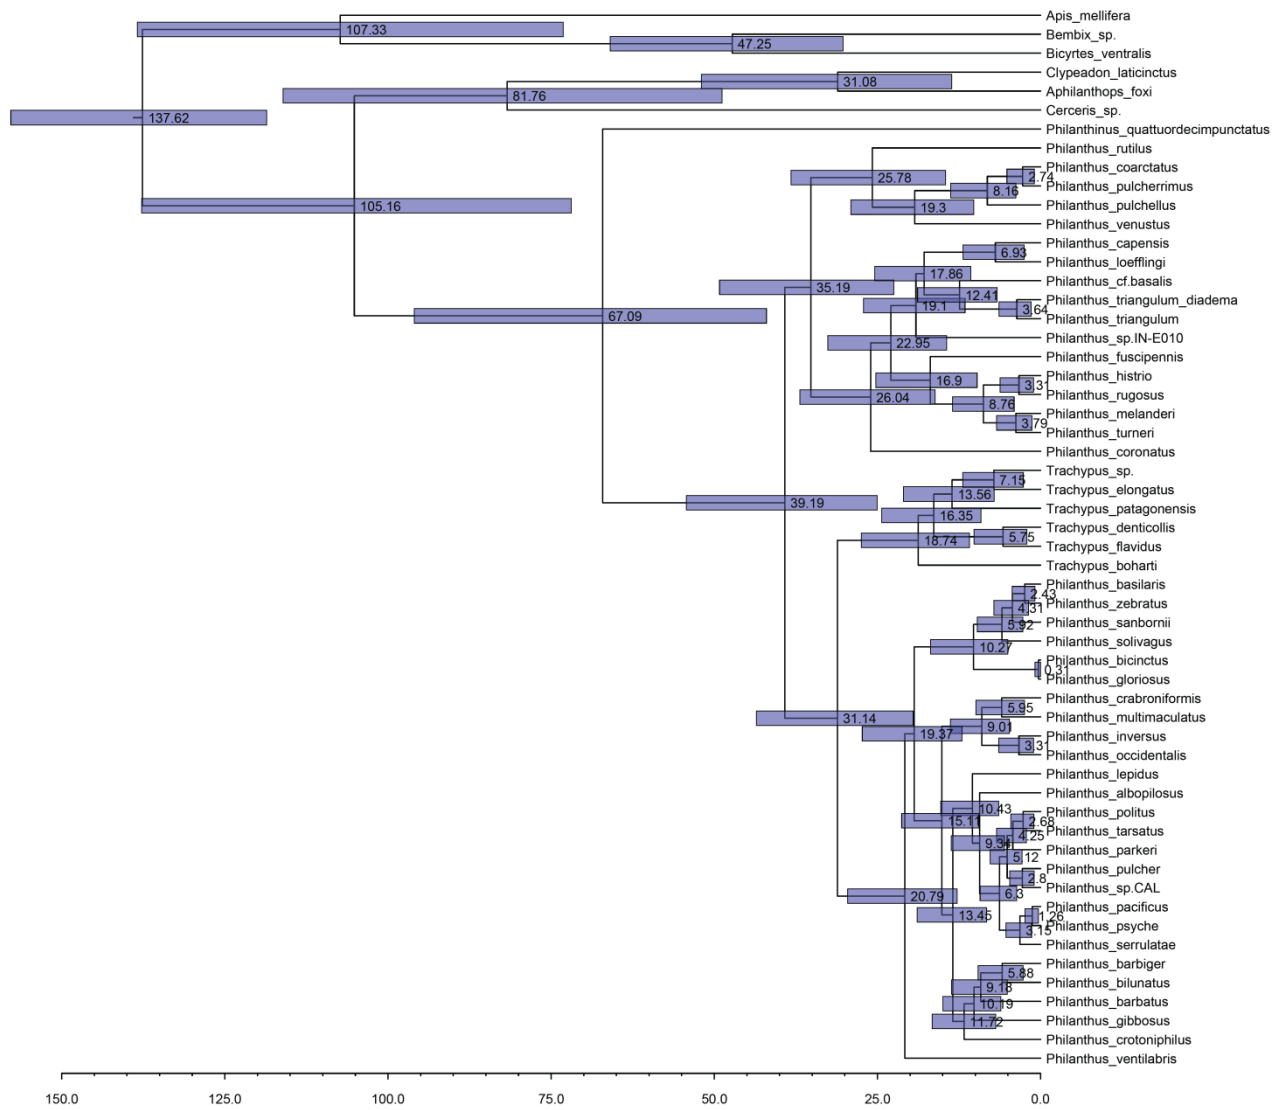

**Figure S2:** Dated phylogeny of the Philanthinae. Phylogenetic tree with the highest clade credibility resulting from BEAST analyses under the uncorrelated lognormal clock model, based on the combined, partitioned 6-gene-data set (codon partitioning [1+2, 3] for the protein-coding genes), using the HKY+G substitution model and the ML tree from the host phylogenetic analyses as the starting tree. Node ages are shown in million years ago (Mya) with their 95% HPD interval bars (equivalent to 95% confidence intervals). The fossils of *Cerceris berlandi* (~30 Mya, used to calibrate the age of the Cercerini+Aphilanthopini with a uniform distribution with minimum 30 Mya) and *Psammaecius sepultus* (~34.1 Mya, used to calibrate the age of the Bembecini by a lognormal distribution with mean±SD=34.1±0.5, offset=20.0) as well the age of the root (modelled with a normal distribution with mean±SD=140.0±10.0 based on earlier phylogenetic analyses) were used for age calibration. The scale represents divergence time in Mya.

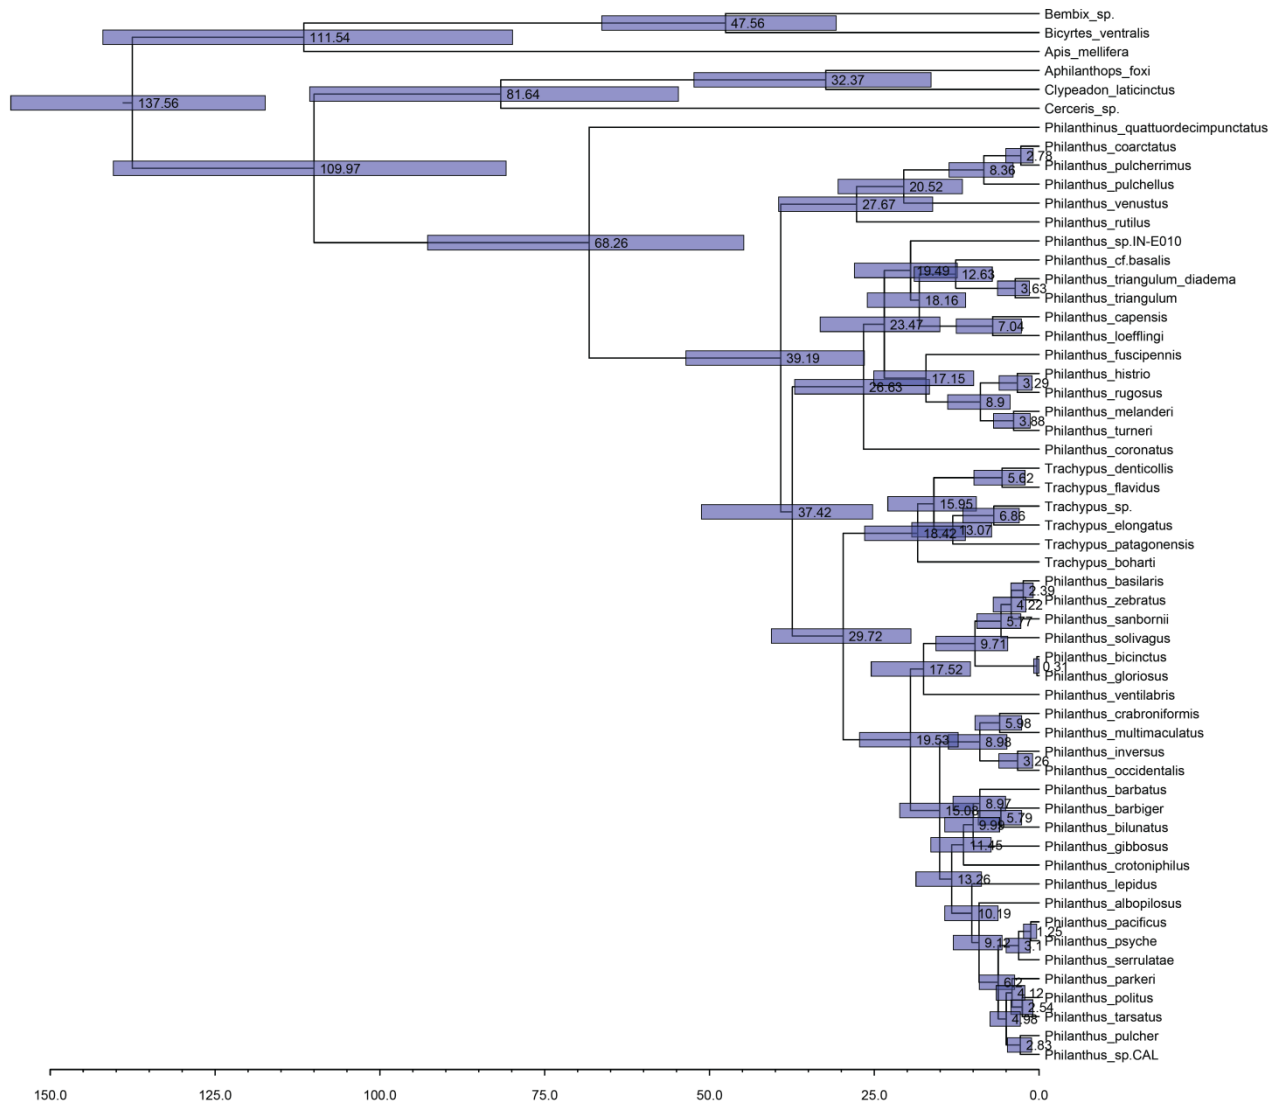

**Figure S3:** Dated phylogeny of the Philanthinae. Phylogenetic tree with the highest clade credibility resulting from BEAST analyses under the uncorrelated lognormal clock model, based on the combined, partitioned 6-gene-data set (codon partitioning [1+2, 3] for the protein-coding genes), using the HKY+G substitution model. The tree topology was fixed to the ML tree from the host phylogenetic analyses. Node ages are shown in million years ago (Mya) with their 95% HPD interval bars (equivalent to 95% confidence intervals). The same calibration points as in Fig. S2 were used. The scale represents divergence time in Mya.

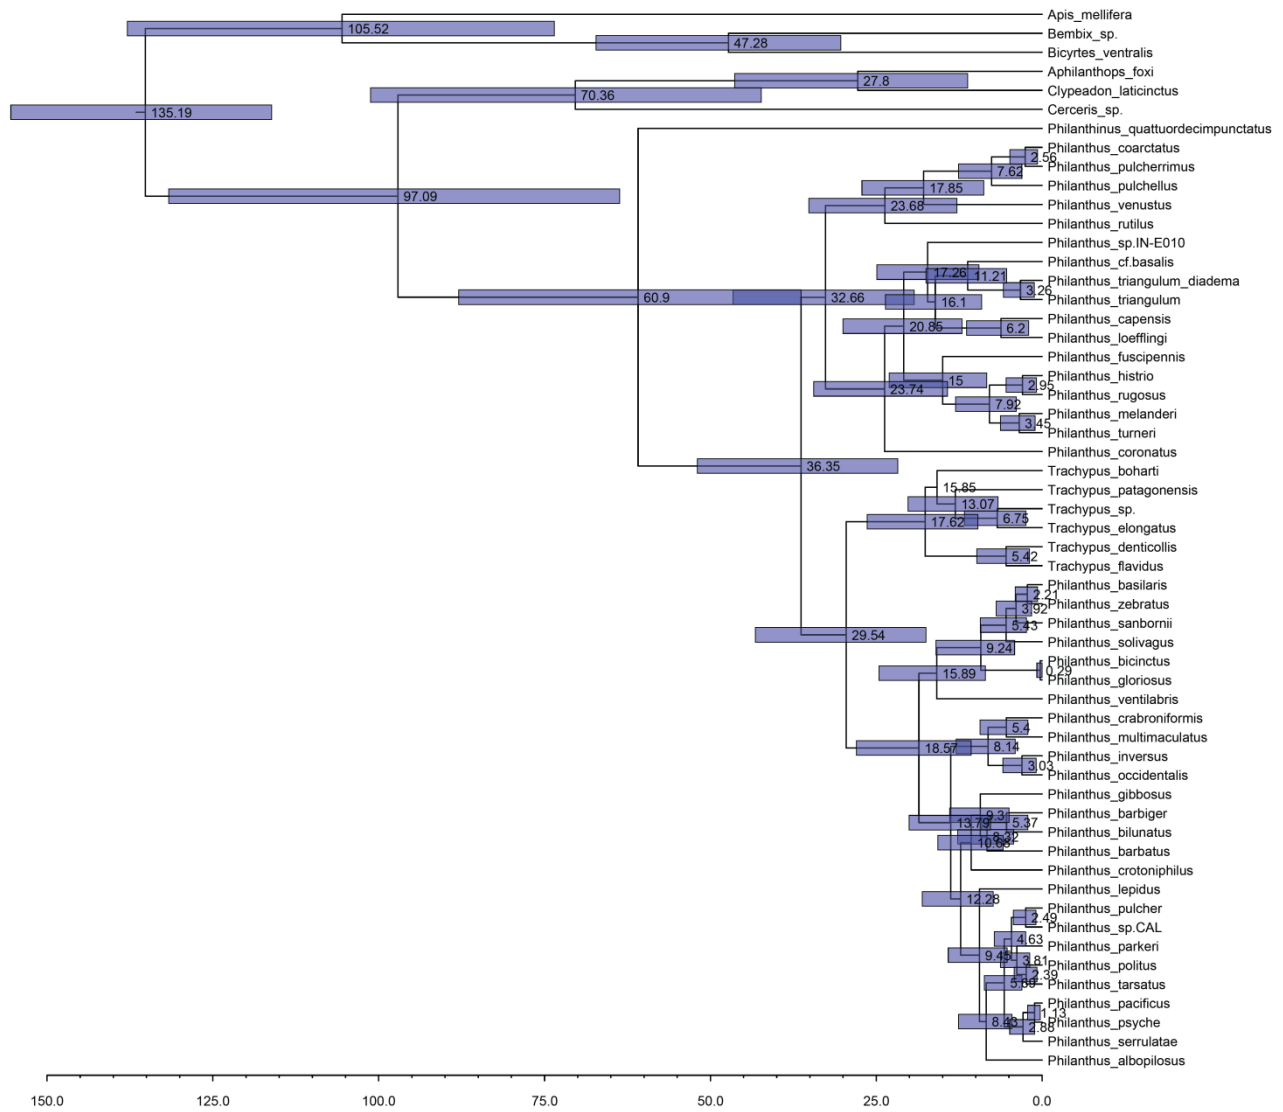

**Figure S4:** Dated phylogeny of the Philanthinae. Phylogenetic tree with the highest clade credibility resulting from BEAST analyses under the uncorrelated lognormal clock model, based on the combined, partitioned 6-gene-data set (codon partitioning [1+2, 3] for the protein-coding genes), using the HKY+G+I substitution model and the ML tree from the host phylogenetic analyses as the starting tree. Node ages are shown in million years ago (Mya) with their 95% HPD interval bars (equivalent to 95% confidence intervals). The same calibration points as in Fig. S2 were used. The scale represents divergence time in Mya.



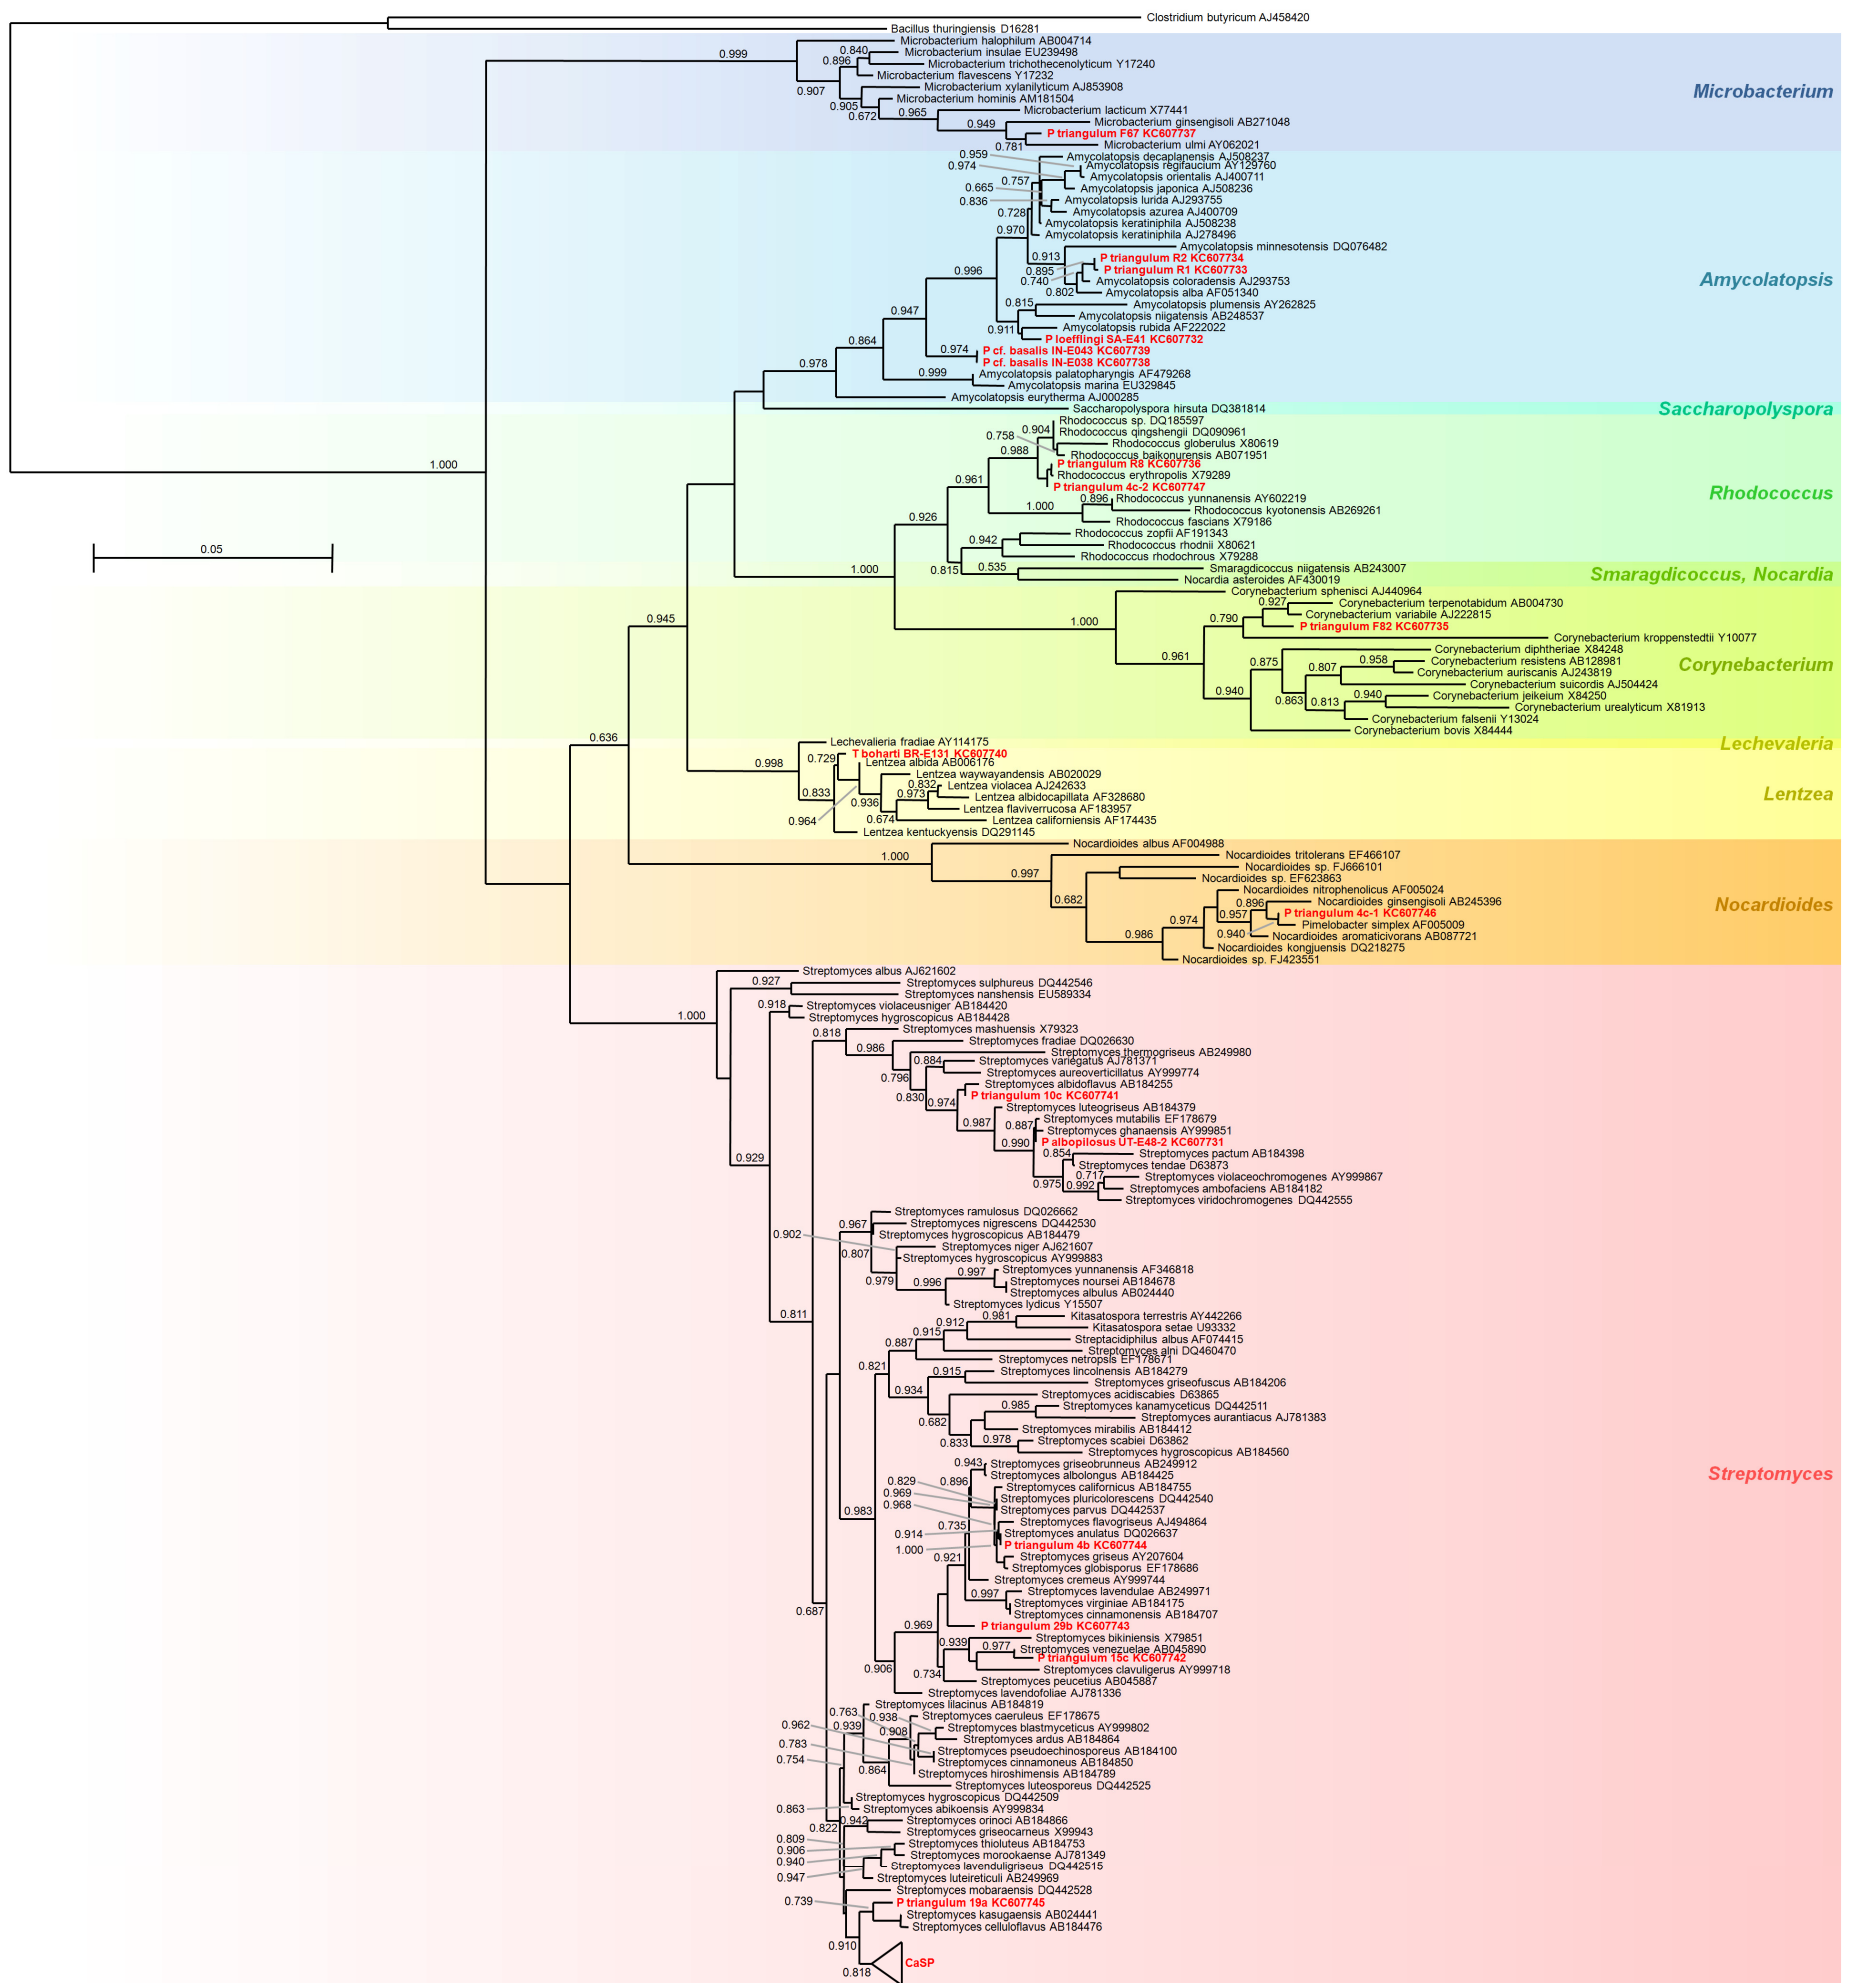

**Figure S5:** Phylogenetic placement of Actinobacteria detected in beewolf antennae based on 16S rRNA sequence data. While the majority of the infected antennae of all individuals harbored bacteria within the CaSP symbiont clade (98%), other strains within *Streptomyces*, *Amycolatopsis*, *Microbacterium*, *Nocardioidea*, *Corynebacterium*, *Lentzea*, and *Rhodococcus* were occasionally recorded. The approximately-maximum-likelihood tree was reconstructed with FastTree based on a secondary-structure guided alignment of 16S rRNA sequences with the SINA aligner. Sequences obtained from beewolf antennae are highlighted in bold red font. Scale bar represents substitutions per site.

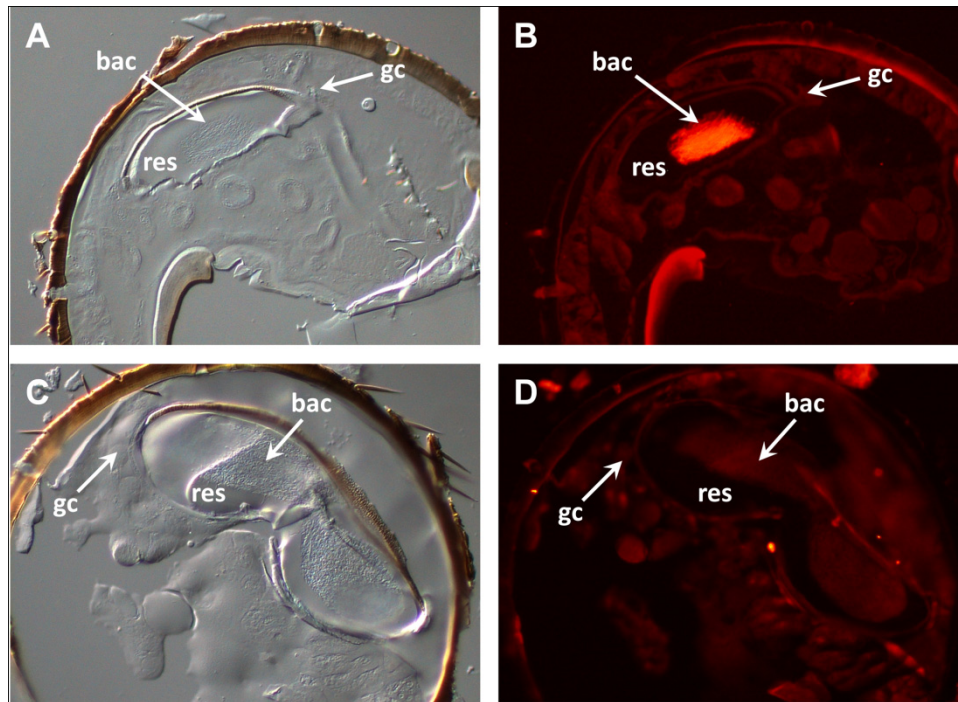

**Figure S6:** Replacement of CaSP symbionts by *Amycolatopsis* in antennae of a female *Philanthus* cf. *basalis*. **(A)** and **(C)** Differential interference contrast micrographs of antennal cross-sections. **(B)** and **(D)** Fluorescent micrographs of the same areas, after staining with the *Amycolatopsis*-specific probe Amy\_16S-Cy3 **(B)** or the CaSP-specific probe SPT177-Cy3 **(D)**. bac=bacteria, res=antennal gland reservoir, gc=gland cells.

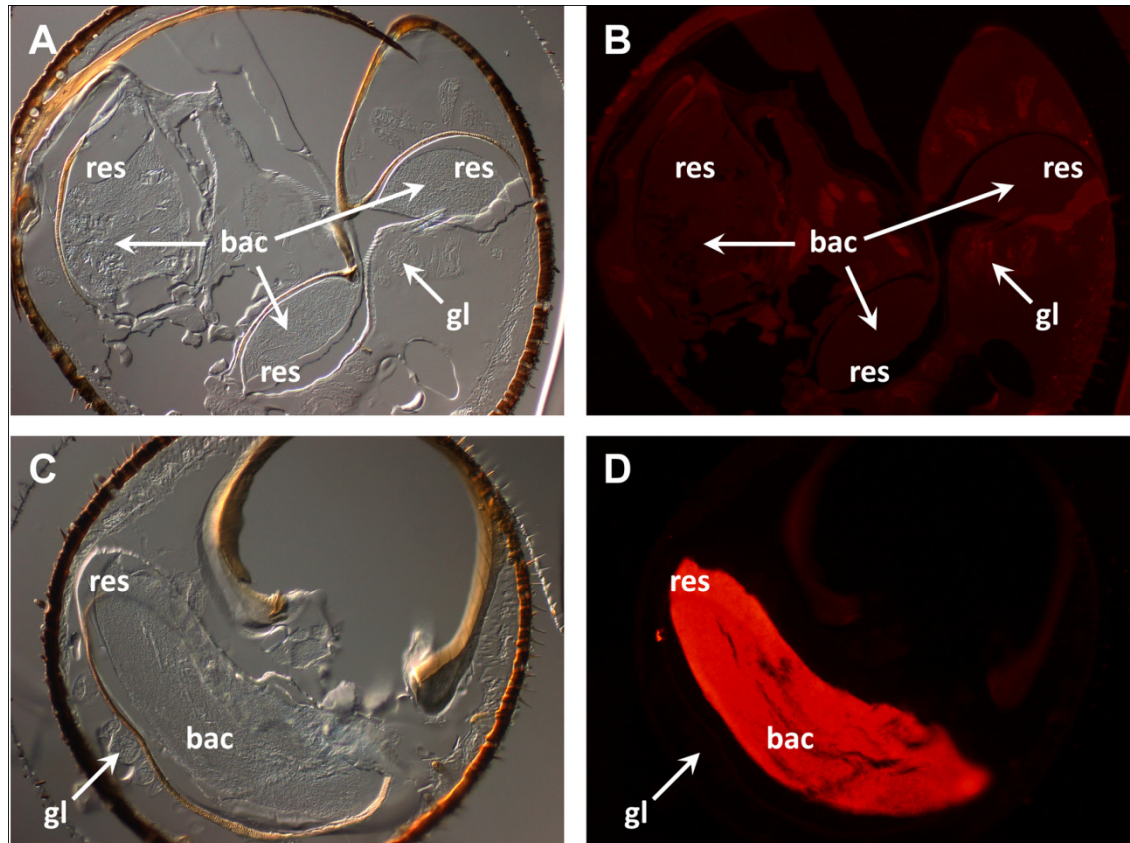

**Figure S7:** FISH of CaSP symbionts in the antennae of a female *Philanthus triangulum*, demonstrating specificity of the probe Amy\_16S-Cy3 for *Amycolatopsis*. (A) and (C) Differential interference contrast micrographs of antennal cross-sections. (B) and (D) Fluorescent micrographs of the same areas, after staining with the *Amycolatopsis*-specific probe Amy\_16S-Cy3 (B) or the CaSP-specific probe SPT177-Cy3 (D). bac= bacteria, res = antennal gland reservoir, gl = gland cells.

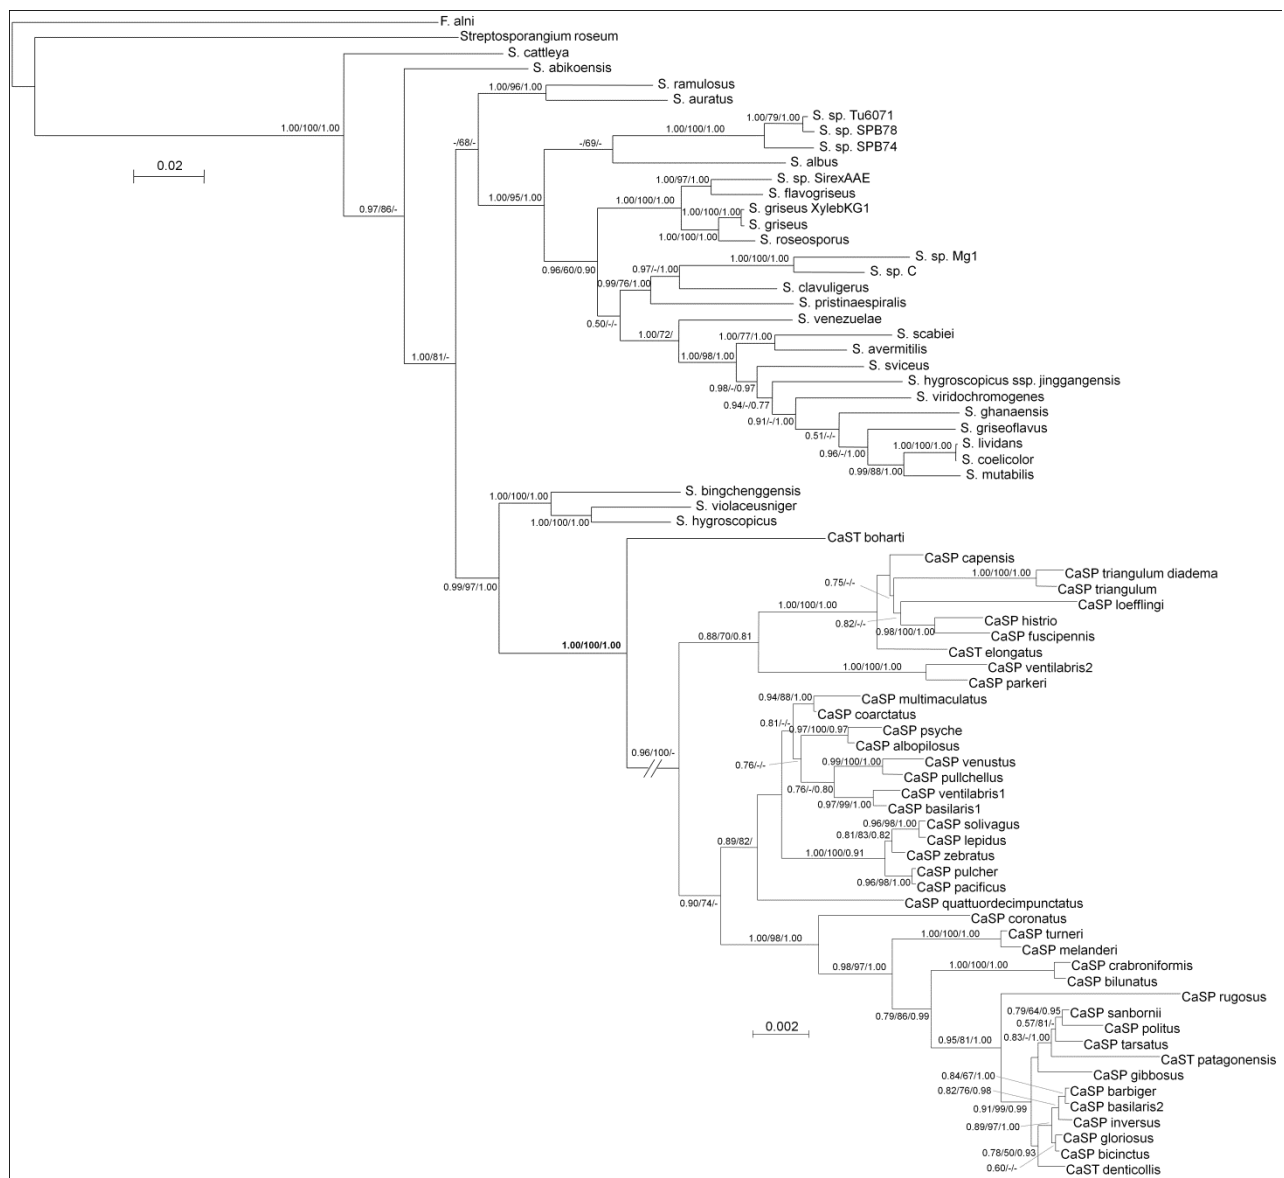

**Figure S8:** Phylogenetic relationships among beewolf symbionts. The phylogeny was reconstructed using Bayesian and maximum likelihood models, based on the concatenated alignment of 16S rRNA, *gyrA*, *gyrB*, and EF-Tu/G (4653 aligned bp). Values at the nodes are local support values from the FastTree analysis (GTR model), bootstrap values for the PHYML analysis (Geneious), and Bayesian posteriors, respectively. Scale bars represent substitutions per site.

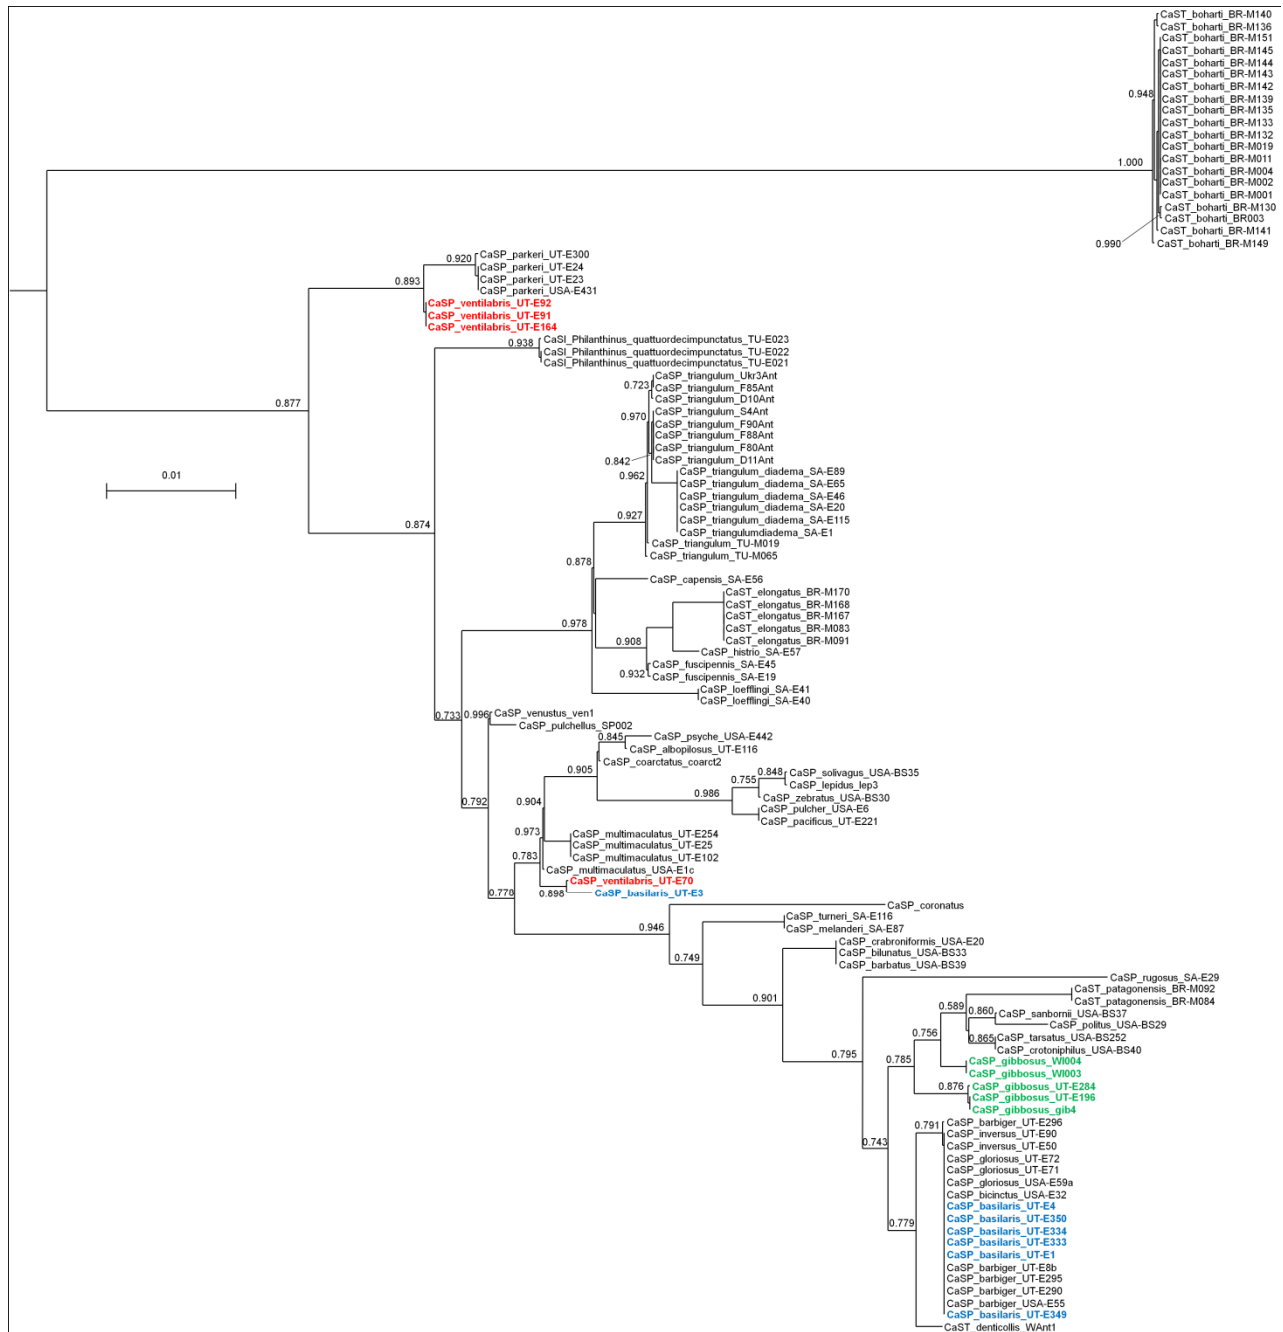

**Figure S9:** Phylogenetic relationships among symbionts of 109 beewolf individuals across 41 species. The phylogeny was reconstructed using FastTree (GTR model), based on partial gyrase A (*gyrA*) sequences. Numbers at the nodes represent local support values. Host species with individuals carrying symbionts in different clades are highlighted in different colors. Scale bar represents substitutions per site.



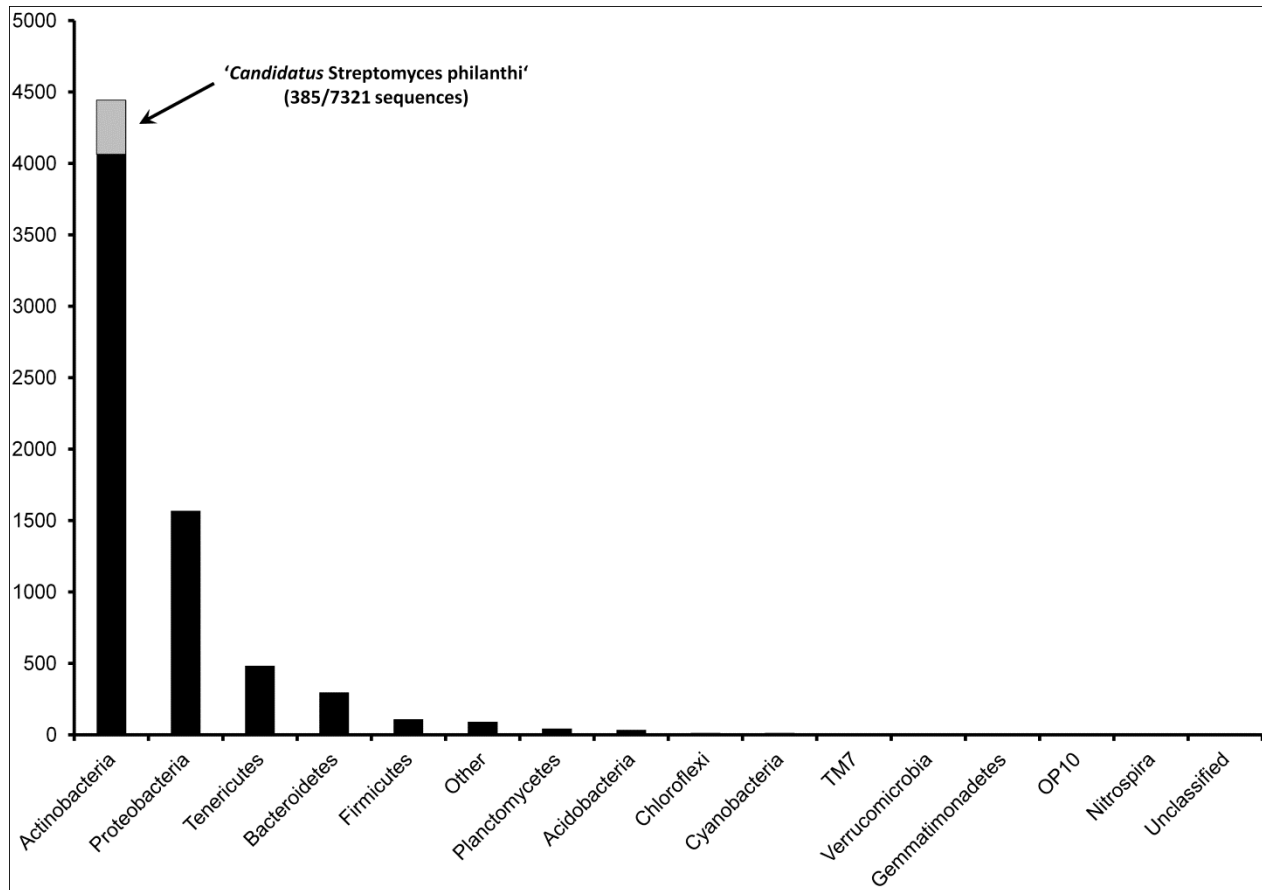

**Figure S10:** Detection of CaSP in sand from beewolf rearing cages. The microbial community composition was determined by bacterial tag-encoded FLX amplicon sequencing (bTEFAP) of bacterial 16S rRNA. After quality control, denoising and OTU picking (cdhit and uclust), OTUs were combined based on phylum-level taxonomic affiliation. The proportion of '*Candidatus Streptomyces philanthi triangulum*' 16S reads is highlighted in grey.

## Supplementary references

1. Cameron SA & Mardulyn P (2001) Multiple molecular data sets suggest independent origins of highly eusocial behavior in bees (Hymenoptera : Apinae). *Syst Biol* 50(2):194-214.
2. Danforth BN, Brady SG, Sipes SD, & Pearson A (2004) Single-copy nuclear genes recover Cretaceous-age divergences in bees. *Syst Biol* 53(2):309-326.
3. Kawakita A, *et al.* (2003) Evolution and phylogenetic utility of alignment gaps within intron sequences of three nuclear genes in bumble bees (*Bombus*). *Mol Biol Evol* 20(1):87-92.
4. Ramirez SR, Roubik DW, Skov C, & Pierce NE (2010) Phylogeny, diversification patterns and historical biogeography of euglossine orchid bees (Hymenoptera: Apidae). *Biol J Linnean Soc* 100(3):552-572.
5. Hall TA (1999) BioEdit: a user-friendly biological sequence alignment editor and analysis program for Windows 95/98/NT. *Nucleic Acids Symp Ser* 41:95-98.
6. Gouy M, Guindon S, & Gascuel O (2010) SeaView Version 4: a multiplatform graphical user interface for sequence alignment and phylogenetic tree building. *Mol Biol Evol* 27(2):221-224.
7. Stamatakis A, Ludwig T, & Meier H (2005) RAXML-III: a fast program for maximum likelihood-based inference of large phylogenetic trees. *Bioinformatics* 21(4):456-463.
8. Stamatakis A (2006) RAXML-VI-HPC: Maximum likelihood-based phylogenetic analyses with thousands of taxa and mixed models. *Bioinformatics* 22(21):2688-2690.
9. Stamatakis A, Hoover P, & Rougemont J (2008) A rapid bootstrap algorithm for the RAXML web servers. *Syst Biol* 57(5):758-771.
10. Tavaré S (1986) Some probabilistic and statistical problems on the analysis of DNA sequences. *Lectures in mathematics in the life sciences*, (American Mathematical Society), Vol 17, pp 57-86.
11. Yang Z (1993) Maximum likelihood estimation of phylogeny from DNA sequences when substitution rates differ over sites. *Mol Biol Evol* 10:1396-1401.
12. Yang Z (1994) Maximum likelihood phylogenetic estimation from DNA sequences with variable rates over sites: Approximate methods. *J Mol Evol* 39:306-314.
13. Swofford DL (2003) *PAUP\**. *Phylogenetic analysis using parsimony (and other methods)*, Version 4 (Sinauer Associates, Sunderland, Massachusetts).
14. Abascal F, Zardoya R, & Posada D (2005) ProtTest: selection of best-fit models of protein evolution. *Bioinformatics* 21(9):2104-2105.
15. Huelsenbeck JP & Ronquist F (2001) MrBayes: Bayesian inference of phylogenetic trees. *Bioinformatics* 17(8):754-755.
16. Huelsenbeck JP, Ronquist F, Nielsen R, & Bollback JP (2001) Bayesian inference of phylogeny and its impact on evolutionary biology. *Science* 294(5550):2310-2314.
17. Ronquist F & Huelsenbeck JP (2003) MrBayes 3: Bayesian phylogenetic inference under mixed models. *Bioinformatics* 19(12):1572-1574.
18. Drummond AJ & Rambaut A (2007) BEAST: Bayesian evolutionary analysis by sampling trees. *BMC Evol Biol* 7.

19. Drummond AJ, Ho SYW, Phillips MJ, & Rambaut A (2006) Relaxed phylogenetics and dating with confidence. *PLoS Biol* 4(5):699-710.
20. Cockerell TDA (1906) Fossil Hymenoptera from Florissant, Colorado. *Bull Mus Comp Zool Harvard Coll* 50:31-58.
21. Pulawski WJ & Rasnitsyn AP (1980) The taxonomic position of *Hoplisis sepultus* from the lower oligocene of Colorado. *Polskie Pismo Entomologiczne* 50(3):393-396.
22. Evanoff E, McIntosh WC, & Murphey PC (2001) Stratigraphic summary and 40AR/39AR geochronology of the Florissant Formation, Colorado. *Proc Denver Mus Nat Sci* 4(1):1-16.
23. Timon-David J (1944) Insectes fossiles de l'Oligocene inferieur des Camoins (Bassin de Marseille). I.-Dipteres brachyceres. II. Hymenopteres [Fossil insects of the lower Oligocene in Camoins (Bassin de Marseille). I. Diptera, Brachycera. II. Hymenoptera]. *Bull Soc Entomol Fr* 48:40-45. French
24. Rohwer SA (1909) Three new fossil insects from Florissant, Colorado. *Am J Sci* 28(168):533-536.
25. Theobald N (1937) Les insectes fossiles des terrains oligocenes de France [The fossil insects of oligocene soils in France]. *Mem Soc Sci Nancy* 473:1-473. French
26. Cardinal S & Danforth BN (2013) Bees diversified in the age of eudicots. *P Roy Soc B-Biol Sci* 280(1755).
27. Grimaldi D & Engel MS (2005) *Evolution of the insects* (Cambridge University Press, New York) pp 1-755.
28. Debevec AH, Cardinal S, & Danforth BN (2012) Identifying the sister group to the bees: a molecular phylogeny of Aculeata with an emphasis on the superfamily Apoidea. *Zool Scr* 41(5):527-535.
29. Melo GAR (1999) Phylogenetic relationships and classification of the major lineages of Apoidea (Hymenoptera), with emphasis on the crabronid wasps. *Univ Kansas Nat Hist Mus* 14:1-55.
30. Cockerell TDA (1915) British fossil insects. *Proc US Natl Mus* 49(2119):469-499.
31. Brady SG, Larkin L, & Danforth BN (2009) Bees, ants, and stinging wasps (Aculeata). *The timetree of life.*, eds Hedges SB & Kumar S), pp 264-269.
32. Rambaut A & Drummond AJ (2007) Tracer v1.4. Available from <http://beast.bio.ed.ac.uk/Tracer>.
33. Rambaut A (2010) FigTree v1.3.1: Tree figure drawing tool. Available from <http://tree.bio.ed.ac.uk/software/figtree>.
34. Sambrook J, Fritsch EF, & Maniatis T (1989) *Molecular cloning: a laboratory manual* (Cold Spring Harbor Laboratory Press, New York) 2<sup>nd</sup> ed. Ed.
35. Kaltenpoth M, *et al.* (2006) 'Candidatus Streptomyces philanthi', an endosymbiotic streptomycete in the antennae of *Philanthus digger* wasps. *Int J Syst Evol Microbiol* 56(6):1403-1411.
36. Kaltenpoth M, Schmitt T, Polidori C, Koedam D, & Strohm E (2010) Symbiotic streptomycetes in antennal glands of the South American digger wasp genus *Trachypus* (Hymenoptera, Crabronidae). *Physiol Entomol* 35(2):196-200.
37. Kaltenpoth M, Yildirim E, Gürbüz MF, Herzner G, & Strohm E (2012) Refining the roots of the beewolf-*Streptomyces* symbiosis: Antennal symbionts in the rare genus *Philanthinus* (Hymenoptera, Crabronidae). *Appl Environ Microbiol* 78(3):822-827.
38. Drummond AJ, *et al.* (2011) Geneious v5.4 (Biomatters Ltd., Auckland, New Zealand).



39. Ludwig W, *et al.* (2004) ARB: a software environment for sequence data. *Nucleic Acids Res* 32(4):1363-1371.
40. Price MN, Dehal PS, & Arkin AP (2010) FastTree 2 - Approximately maximum-likelihood trees for large alignments. *PLoS ONE* 5(3):e9490.
41. Guindon S & Gascuel O (2003) A simple, fast, and accurate algorithm to estimate large phylogenies by maximum likelihood. *Syst Biol* 52(5):696-704.
42. Iwamoto T, *et al.* (2000) Monitoring impact of in situ biostimulation treatment on groundwater bacterial community by DGGE. *FEMS Microbiol Ecol* 32(2):129-141.
43. Kawai M, *et al.* (2002) 16S ribosomal DNA-based analysis of bacterial diversity in purified water used in pharmaceutical manufacturing processes by PCR and denaturing gradient gel electrophoresis. *Appl Environ Microbiol* 68(2):699-704.
44. Stoll S, Gadau J, Gross R, & Feldhaar H (2007) Bacterial microbiota associated with ants of the genus *Tetraponera*. *Biol J Linnean Soc* 90(3):399-412.
45. Pruesse E, *et al.* (2007) SILVA: a comprehensive online resource for quality checked and aligned ribosomal RNA sequence data compatible with ARB. *Nucleic Acids Res* 35(21):7188-7196.
46. Pruesse E, Peplies J, & Gloeckner FO (2012) SINA: Accurate high-throughput multiple sequence alignment of ribosomal RNA genes. *Bioinformatics* 28(14):1823-1829.
47. Amann RI, *et al.* (1990) Combination of 16S ribosomal RNA targeted oligonucleotide probes with flow-cytometry for analyzing mixed microbial populations. *Appl Environ Microbiol* 56(6):1919-1925.
48. Strohm E & Linsenmair KE (1995) Leaving the cradle - how beeswolves (*Philanthus triangulum* F.) obtain the necessary spatial information for emergence. *Zoology* 98(3):137-146.
49. Berry AE, Chiocchini C, Selby T, Sosio M, & Wellington EMH (2003) Isolation of high molecular weight DNA from soil for cloning into BAC vectors. *FEMS Microbiol Lett* 223(1):15-20.
50. Ishak HD, *et al.* (2011) Bacterial diversity in *Solenopsis invicta* and *Solenopsis geminata* ant colonies characterized by 16S amplicon 454 pyrosequencing. *Microb Ecol*:1-11.
51. Sun Y, Wolcott RD, & Dowd SE (2011) Tag-encoded FLX amplicon pyrosequencing for the elucidation of microbial and functional gene diversity in any environment. *Methods Mol Biol* 733:129-141.
52. Caporaso JG, *et al.* (2010) QIIME allows analysis of high-throughput community sequencing data. *Nat Methods* 7(5):335-336.
53. Reeder J & Knight R (2010) Rapidly denoising pyrosequencing amplicon reads by exploiting rank-abundance distributions. *Nat Methods* 7(9):668-669.
54. Li W & Godzik A (2006) Cd-hit: a fast program for clustering and comparing large sets of protein or nucleotide sequences. *Bioinformatics* 22(13):1658-1659.
55. Edgar RC (2010) Search and clustering orders of magnitude faster than BLAST. *Bioinformatics* 26(19):2460-2461.
56. Caporaso JG, *et al.* (2010) PyNAST: a flexible tool for aligning sequences to a template alignment. *Bioinformatics* 26(2):266-267.
57. Wang Q, Garrity GM, Tiedje JM, & Cole JR (2007) Naive Bayesian classifier for rapid assignment of rRNA sequences into the new bacterial taxonomy. *Appl Environ Microbiol* 73(16):5261-5267.

58. Weisburg WG, Barns SM, Pelletier DA, & Lane DJ (1991) 16s ribosomal DNA amplification for phylogenetic study. *J Bacteriol* 173(2):697-703.
59. Hain T, WardRainey N, Kroppenstedt RM, Stackebrandt E, & Rainey FA (1997) Discrimination of *Streptomyces albidoflavus* strains based on the size and number of 16S-23S ribosomal DNA intergenic spacers. *Int J Syst Bacteriol* 47(1):202-206.
60. Hatano K, Nishii T, & Kasai H (2003) Taxonomic re-evaluation of whorl-forming *Streptomyces* (formerly *Streptoverticillium*) species by using phenotypes, DNA-DNA hybridization and sequences of *gyrB*, and proposal of *Streptomyces luteireticuli* (ex Katoh and Aral 1957) corrig., sp nov., nom. rev. *Int J Syst Evol Microbiol* 53:1519-1529.
61. Kaltenpoth M, Gottler W, Herzner G, & Strohm E (2005) Symbiotic bacteria protect wasp larvae from fungal infestation. *Curr Biol* 15(5):475-479.
62. Danforth BN, Conway L, & Ji SQ (2003) Phylogeny of eusocial *Lasioglossum* reveals multiple losses of eusociality within a primitively eusocial clade of bees (Hymenoptera : Halictidae). *Syst Biol* 52(1):23-36.
63. Danforth BN, Sauquet H, & Packer L (1999) Phylogeny of the bee genus *Halictus* (Hymenoptera : Halictidae) based on parsimony and likelihood analyses of nuclear EF-1 alpha sequence data. *Mol Phylogenet Evol* 13(3):605-618.
64. Danforth BN, Sipes S, Fang J, & Brady SG (2006) The history of early bee diversification based on five genes plus morphology. *Proc Natl Acad Sci USA* 103(41):15118-15123.
65. Mardulyn P & Cameron SA (1999) The major opsin in bees (Insecta: hymenoptera): A promising nuclear gene for higher level phylogenetics. *Mol Phylogenet Evol* 12(2):168-176.
66. Folmer O, Black M, Hoeh W, Lutz R, & Vrijenhoek R (1994) DNA primers for amplification of mitochondrial cytochrome c oxidase subunit I from diverse metazoan invertebrates. *Mol Mar Biol Biotechnol* 3(5):294-299.
67. Kronauer DJ, Holldobler B, & Gadau J (2004) Phylogenetics of the new world honey ants (genus *Myrmecocystus*) estimated from mitochondrial DNA sequences. *Mol Phylogenet Evol* 32(1):416-421.
68. Brower AVZ & DeSalle R (1998) Patterns of mitochondrial versus nuclear DNA sequence divergence among nymphalid butterflies: the utility of wingless as a source of characters for phylogenetic inference. *Insect Mol Biol* 7(1):73-82.
69. Stach JEM, Maldonado LA, Ward AC, Goodfellow M, & Bull AT (2003) New primers for the class Actinobacteria: application to marine and terrestrial environments. *Environ Microbiol* 5(10):828-841.
